# Supplementary material for: Reducing COVID-19 Vaccine Fatigue: Results of Two Conjoint Experiments
Source: Research Square preprint supplement (doi:10.21203/rs.3.rs-2094058/v1), 2022-09-30
Supplement: Supplementary file 2 [file ff6a8bed05597ddd98f0ef5b.pdf]

# Appendix with Supplemental Information

## Table of Contents

|                                                                                                              |    |
|--------------------------------------------------------------------------------------------------------------|----|
| SUPPLEMENTAL FILE 1. DETAILS ON THE SURVEY AND SAMPLE SIZE CALCULATION .....                                 | 2  |
| SUPPLEMENTAL FILE 2. EMOTIONS BY COUNTRY (A) AND VACCINATION STATUS (B) .....                                | 3  |
| SUPPLEMENTAL FILE 3. TRUST IN INSTITUTIONS BY COUNTRY (A) AND VACCINATION STATUS (B) .....                   | 4  |
| SUPPLEMENTAL FILE 4. CHARATERISTICS OF VACCINATION STATUS GROUPS.....                                        | 5  |
| SUPPLEMENTAL FILE 5. SAMPLE CHARACTERISTICS .....                                                            | 6  |
| SUPPLEMENTAL FILE 6. DETAILS ON EXPERIMENT 1 – A HYPOTHETICAL VACCINATION CAMPAIGN .....                     | 7  |
| SUPPLEMENTAL FILE 7. DETAILS ON EXPERIMENT 2 – MEDIA COMMUNICATION ON VACCINATIONS .....                     | 12 |
| SUPPLEMENTAL FILE 8. DETAILS ON HOW WE DEALT WITH MISSING VALUES .....                                       | 16 |
| SUPPLEMENTAL FILE 9. EFFECTS ON THE EVALUATION OF THE CAMPAIGN BY COUNTRY (EXPERIMENT 1).....                | 17 |
| SUPPLEMENTAL FILE 10. EFFECTS ON THE LIKELIHOOD TO GET VACCINATED BY COUNTRY (EXPERIMENT 1).....             | 18 |
| SUPPLEMENTAL FILE 11. EFFECTS ON THE EVALUATION OF THE CAMPAIGN BY VACCINATION STATUS (EXPERIMENT 1) .....   | 19 |
| SUPPLEMENTAL FILE 12. EFFECTS ON THE LIKELIHOOD TO GET VACCINATED BY VACCINATION STATUS (EXPERIMENT 1) ..... | 21 |
| SUPPLEMENTAL FILE 13. EFFECTS ON TRUST IN THE VACCINE BY COUNTRY (EXPERIMENT 2).....                         | 23 |
| SUPPLEMENTAL FILE 14. EFFECTS ON THE LIKELIHOOD TO GET VACCINATED BY COUNTRY (EXPERIMENT 2).....             | 24 |
| SUPPLEMENTAL FILE 15. EFFECTS ON TRUST IN THE VACCINE BY VACCINATION STATUS (EXPERIMENT 2).....              | 25 |
| SUPPLEMENTAL FILE 16. EFFECTS ON THE LIKELIHOOD TO GET VACCINATED BY VACCINATION STATUS (EXPERIMENT 2) ..... | 27 |
| SUPPLEMENTAL FILE 17. STROBE STATEMENT.....                                                                  | 29 |

## Supplemental File 1. Details on the survey and sample size calculation

### *Survey details*

The survey was planned and designed in early summer 2022, with the goal to provide scientific evidence for potential vaccination campaigns in future scenarios of the pandemic. Conjoint experiments had been used previously by earlier studies to analyze how a broad range of factors affects vaccine acceptance and the research design seemed very suitable to explore the implications of various future scenarios. We reviewed the literature on vaccination readiness to identify relevant attributes to be manipulated in the experiment. We also consulted with practitioners in the public health sector and country experts to assess what kind of new and current developments might have consequences for vaccine uptake in future scenarios. We found that both the objective conditions such as virus variants and availability of new vaccines as well as more subjective factors such as motivations were likely to play a role. Also, the evidence suggested that in addition to the vaccination campaigns, media coverage on vaccinations and the wider information environment were likely to affect the public mood when further rounds of vaccinations would need necessary. We therefore included two experiments to cover both of these aspects. Details on the experiments are provided in Supplemental File 6 and 7.

The standardized questionnaire was designed for interviews to last for about 15 minutes. All questions were asked in a closed-ended format. We used nominal scales, 5-point Likert-type scales as well as numerical rating scales (e.g. 0 to 10 rating scale) to record the responses. The translations of the questions were done by native speakers and checked by experts familiar with the local conditions and vaccination discourse in Austria and Italy.

The questionnaire was then programmed and tested. Before the questionnaire was fielded, the survey was pilot tested by the research team and lay-persons and some minor adjustments were made based on the feedback. The survey was then fielded by the survey company and the interviews were realized as Computer-Assisted Personal Interviews (CAPI).

We used population-representative quotas for the recruitment of respondents. The target population in each country were residents aged 14+ years. Please note that from the age of 14 adolescents in Austria and Italy can decide for themselves, without their parents' consent, whether they want to be vaccinated or not. The quota targets and actual values in the sample are shown in Supplemental File 5. Please note that, although we aimed to make the sample structure match as closely as possible to the targets, some subgroups of the population remain hard to reach for online surveys (e.g. very high age, language minorities).

### *Sample size calculation*

We calculated a minimum sample size of 2,017 for a conjoint experiment based on the size of the population of Austria/Italy, desired confidence levels of 95% and error margins of 2%. We also took into consideration that it might not be possible to motivate some groups in the population for further vaccinations due to vaccine fatigue. Although in July 2022 about 77% of Austrians and 85% of Italian had received at least one dose, only 59% in Austria reported and 72% of Italians had received the first booster vaccinations. Based on these numbers, we estimated that about only two thirds of the respondents in our sample might be susceptible to treatment, whereas about one third would refuse vaccination under any scenario. We therefore opted for a sample size of approx. 3000 for each country.

### *Assessment of data quality*

To assess data quality, we investigated non-response patterns. Specifically, we calculated the number of times respondents did not give substantial answers ("Don't know", "No answer"). We flagged an interview as suspicious when respondents gave an unsubstantial answer more than 50% of the time. We found no Austrians and 151 Italian participants for whom this was true and performed the analyses with and without these participants. There were no changes in the results of the conjoint experiments and for this reason did not exclude these participants from the analyses.

## Supplemental File 2. Emotions by country (A) and vaccination status (B)

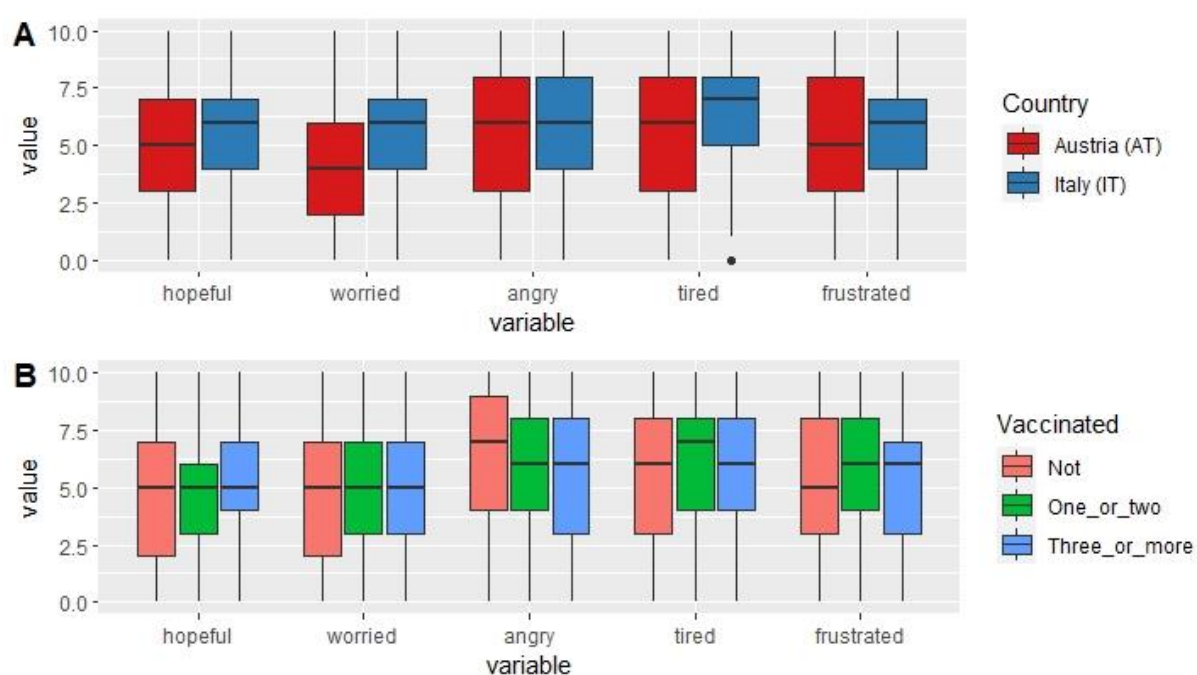

Notes: Boxplots showing the median (+/-1.5 IQR). To assess emotions, respondents were asked the following question: "When you think of the Corona crisis, how much do you feel...?". For each item (hope, worry, anger, fatigue, frustration) respondents recorded their responses on a scale ranging from 0 "not at all" to 10 "very much".

|           | hopeful  | worried  | agry     | tired    | frustrated |
|-----------|----------|----------|----------|----------|------------|
| Responses | 6,087    | 6,149    | 6,117    | 6,121    | 6,123      |
| Missing   | 270 (4%) | 208 (3%) | 240 (4%) | 236 (4%) | 234 (4%)   |

### Supplemental File 3. Trust in institutions by country (A) and vaccination status (B)

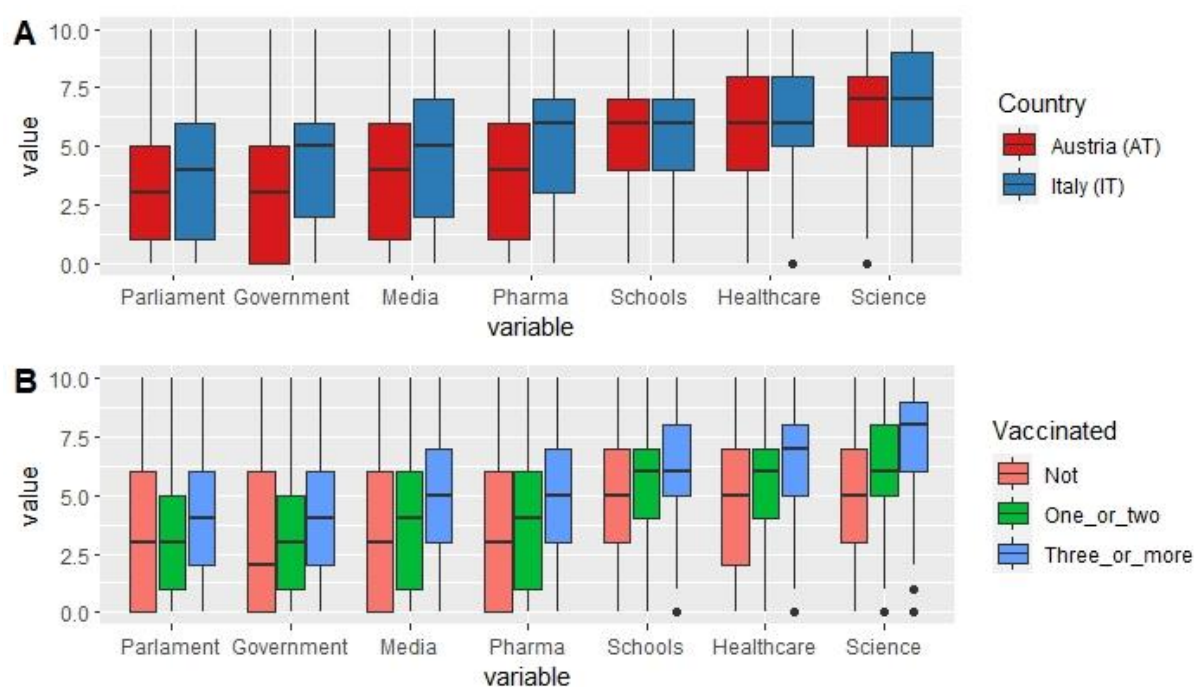

Notes: Boxplots showing the median (+/-1.5 IQR). To assess institutional trust, respondents were asked the following question: "How much trust do you have in each of the institutions mentioned?" For each item (parliament, government, media, pharma companies, schools, healthcare system, science) respondents recorded their responses on a 0-to-10 scale, ranging from 0 "no trust at all" to 10 "very much trust".

|           | Parliament | Government | Media    | Pharma   | Schools  | Healthcare | Science  |
|-----------|------------|------------|----------|----------|----------|------------|----------|
| Responses | 6,146      | 6,133      | 6,150    | 6,119    | 6,121    | 6,171      | 6,158    |
| Missing   | 211 (3%)   | 224 (4%)   | 207 (3%) | 238 (4%) | 236 (4%) | 186 (3%)   | 199 (3%) |

#### Supplemental File 4. Characteristics of vaccination status groups

| Vaccination status | N (%)             | Vaccination readiness (mean±SD) | Gender (% male) | Age (mean±SD) | Education (% highest third) |
|--------------------|-------------------|---------------------------------|-----------------|---------------|-----------------------------|
| Not                | 1618 (25%)        | 3.4±3.0                         | <b>50%</b>      | 44±17         | 13%                         |
| 1 or 2             | 878 (14%)         | 4.7±2.6                         | 48%             | 38±16         | 16%                         |
| ≥3                 | <b>3861 (61%)</b> | <b>6.6±2.5</b>                  | 48%             | <b>47±16</b>  | <b>22%</b>                  |

Notes: Highest value per column in bold. Vaccination Readiness is the average of all ratings across all scenarios across both experiments for the likelihood to get vaccinated (measured on a 0-to-10 scale).

# Supplemental File 5. Sample characteristics

|                       | Italy<br>(N=3,170) |        | Austria<br>(N=3,187) |        |
|-----------------------|--------------------|--------|----------------------|--------|
|                       | Target             | Sample | Target               | Sample |
| Gender                |                    |        |                      |        |
| Male                  | 50%                | 46%    | 49.8%                | 48.3%  |
| Female                | 50%                | 48%    | 50.1%                | 51.0%  |
| Other                 | 0%                 | 5.0%   | 0%                   | 1.0%   |
| Age groups            |                    |        |                      |        |
| 14 to 24 years        | 14.0%              | 13.9%  | 15.0%                | 15.4%  |
| 25 to 34 years        | 13.7%              | 13.8%  | 17.5%                | 17.6%  |
| 35 to 44 years        | 16.0%              | 16.8%  | 17.0%                | 16.0%  |
| 45 to 54 years        | 20.6%              | 20.5%  | 19.3%                | 19.0%  |
| 55 to 64 years        | 19.2%              | 19.7%  | 18.1%                | 18.7%  |
| 65+ years             | 16.6%              | 15.3%  | 13.2%                | 13.3%  |
| Education             |                    |        |                      |        |
| Low/Medium            | 40.3%              | 37.3%  | 67.9%                | 68.6%  |
| High                  | 59.7%              | 62.2%  | 32.1%                | 30.4%  |
| Other                 | 0%                 | 0.5%   | 0%                   | 0.9%   |
| Regions: Italy        |                    |        |                      |        |
| Piemonte              | 7.2%               | 8.1%   |                      |        |
| Valle d'Aosta         | 0.2%               | 0.3%   |                      |        |
| Trentino Alto         | 1.8%               | 1.4%   |                      |        |
| Adige Veneto          | 8.2%               | 6.6%   |                      |        |
| Friuli Venezia Giulia | 2.0%               | 2.3%   |                      |        |
| Giulia Liguria        | 2.6%               | 2.7%   |                      |        |
| Lombardia             | 16.9%              | 17.3%  |                      |        |
| Toscana               | 6.2%               | 5.1%   |                      |        |
| Umbria                | 1.5%               | 1.2%   |                      |        |
| Lazio                 | 9.7%               | 9.9%   |                      |        |
| Abruzzo               | 2.2%               | 1.8%   |                      |        |
| Emilia-Romagna        | 7.5%               | 7.5%   |                      |        |
| Sardegna              | 2.7%               | 3.4%   |                      |        |
| Marche                | 2.5%               | 2.3%   |                      |        |
| Campania              | 9.5%               | 9.9%   |                      |        |
| Molise                | 0.5%               | 0.6%   |                      |        |
| Puglia                | 6.6%               | 7.4%   |                      |        |
| Basilicata            | 0.9%               | 0.9%   |                      |        |
| Calabria              | 3.1%               | 2.8%   |                      |        |
| Sicilia               | 8.1%               | 8.5%   |                      |        |
| Regions: Austria      |                    |        |                      |        |
| Vorarlberg            |                    |        | 4.4%                 | 4.1%   |
| Tirol                 |                    |        | 8.5%                 | 8.3%   |
| Salzburg              |                    |        | 6.3%                 | 6.6%   |
| Steiermark            |                    |        | 14.2%                | 14.4%  |
| Kärnten               |                    |        | 6.4%                 | 6.5%   |
| Oberösterreich        |                    |        | 16.6%                | 16.5%  |
| Niederösterreich      |                    |        | 18.9%                | 18.6%  |
| Wien                  |                    |        | 21.4%                | 21.0%  |
| Burgenland            |                    |        | 3.4%                 | 4.0%   |

Notes: Comparison of quota targets used for recruitment of participants and actual values in the sample.

## Supplemental File 6. Details on experiment 1 – A hypothetical vaccination campaign

Experiment 1 was designed to assess scenarios for a hypothetical vaccination campaign. The discussion with experts in public health revealed that there was uncertainty about the evolution of virus variants and we included this attribute to evaluate to what extent the severity of virus variants could influence vaccination decisions. The review of the literature revealed that properties of available vaccines, costs/incentives, as well as campaign messages could affect vaccine uptake. Discussion with country experts revealed that some people seemed to be waiting for new vaccines to become available, with some waiting for inactivated virus vaccines and some waiting for vaccines adapted to the Omicron variants. Regarding campaign messages, the literature suggested that emotions may play an important role for vaccine uptake. To convey emotions, we used a testimonial by a fictive person (randomising age group and gender), making a statement about his or her motivation to get vaccinated. We included statements about economic and health risks at the individual, interpersonal and collective level. Taking up advice from the expert consultations, we also included messages emphasizing a sense of community and self-efficacy. The wording of all attributes and levels are listed at the end of this file (see Table S6.1: English translation, Table S6.2: Original version in German, Table S6.3: Original version in Italian).

The introductory sentence for the experiment read as follows: “Below we present several hypothetical scenarios for calls for further COVID-19 vaccinations. The scenarios include fictional calls for COVID-19 vaccination.” Respondents were then shown two scenarios at a time and were asked to answer two follow-up questions (Q1, Q2). Levels were randomly assigned with equal probabilities and repeatedly recombined, with all combinations being plausible and realistic. The procedure was repeated twice so that each respondent had to evaluate four scenarios in total.

| Scenario 1                                                                                                                                                        | Scenario 2                                                                                                                                                        |
|-------------------------------------------------------------------------------------------------------------------------------------------------------------------|-------------------------------------------------------------------------------------------------------------------------------------------------------------------|
| Virus variants are emerging, <Variant, 1 of 3> and infection rates are increasing. There is a general vaccination recommendation for everyone 14 years and older. | Virus variants are emerging, <Variant, 1 of 3> and infection rates are increasing. There is a general vaccination recommendation for everyone 14 years and older. |
| Available vaccines:<br><Vacc, 1 of 2>                                                                                                                             | Available vaccines:<br><Vacc, 1 of 2>                                                                                                                             |
| Versions of the vaccines adapted to Omicron are<br><Omic, 1 of 2>.                                                                                                | Versions of the vaccines adapted to Omicron are<br><Omic, 1 of 2>.                                                                                                |
| <Incen, 1 of 4>                                                                                                                                                   | <Incen, 1 of 4>                                                                                                                                                   |
| <Name, age>:<br>" <Motiv, 1 of 8>.<br>That's why I'm going to get vaccinated.<br>And what's your plan for the fall?"                                              | <Name, age>:<br>" <Motiv, 1 of 8>.<br>That's why I'm going to get vaccinated.<br>And what's your plan for the fall?"                                              |

Q1. Please imagine the following hypothetical situations for the fall and read the vaccination calls carefully.

In which of these two scenarios does the vaccination call appeal to you more? If you find neither or both calls equally appealing, please decide spontaneously. (Binary choice)

- Scenario 1
- Scenario 2

Q2. On a scale of 0 to 10, how likely is it that you would heed these calls for vaccination and get vaccinated against COVID-19? (Ratings scale)

- Scenario 1: 0 = “would definitely not get vaccinated” to 10 “would definitely get vaccinated”
- Scenario 2: 0 = “would definitely not get vaccinated” to 10 “would definitely get vaccinated”

**Table S6.1: English version**

| Attributes                                                                                                                                                                                                                                                                                                                                                                                                                   | Levels                                                                                                                                                                                                                                                                                                                                                                                                                                                                                                                                                                                                                                                                                                                                                                                                       |
|------------------------------------------------------------------------------------------------------------------------------------------------------------------------------------------------------------------------------------------------------------------------------------------------------------------------------------------------------------------------------------------------------------------------------|--------------------------------------------------------------------------------------------------------------------------------------------------------------------------------------------------------------------------------------------------------------------------------------------------------------------------------------------------------------------------------------------------------------------------------------------------------------------------------------------------------------------------------------------------------------------------------------------------------------------------------------------------------------------------------------------------------------------------------------------------------------------------------------------------------------|
| Virus variants ('Variant') <ul style="list-style-type: none"> <li>Decline</li> <li>No change</li> <li>Escalation</li> </ul>                                                                                                                                                                                                                                                                                                  | <ul style="list-style-type: none"> <li>which are <u>less dangerous</u> than the current virus variant.</li> <li><u>similar to</u> the current virus variant.</li> <li><u>more dangerous</u> than the current virus variant.</li> </ul>                                                                                                                                                                                                                                                                                                                                                                                                                                                                                                                                                                       |
| Type of vaccine ('Vacc') <ul style="list-style-type: none"> <li>mRNA vaccines only</li> <li>mRNA vaccines plus inactivated vaccines</li> </ul>                                                                                                                                                                                                                                                                               | <ul style="list-style-type: none"> <li>mRNA vaccines: BioNtech-Pfizer, Moderna</li> <li>mRNA vaccines: BioNtech-Pfizer, Moderna</li> <li>Inactivated vaccines: Novavax, Valneva</li> </ul>                                                                                                                                                                                                                                                                                                                                                                                                                                                                                                                                                                                                                   |
| Adaptation to Omikron ('Omic')                                                                                                                                                                                                                                                                                                                                                                                               | <ul style="list-style-type: none"> <li>available</li> <li>not available</li> </ul>                                                                                                                                                                                                                                                                                                                                                                                                                                                                                                                                                                                                                                                                                                                           |
| Incentives ('Incen') <ul style="list-style-type: none"> <li>free of charge</li> <li>not free of charge</li> <li>Premium in kind</li> <li>Cash reward</li> </ul>                                                                                                                                                                                                                                                              | <ul style="list-style-type: none"> <li>The vaccination is free of charge.</li> <li>The vaccination costs 20 Euros.</li> <li>For the vaccination, you will receive a shopping voucher for 500 Euros as an expense allowance.</li> <li>For the vaccination you will receive 500 Euros as an expense allowance.</li> </ul>                                                                                                                                                                                                                                                                                                                                                                                                                                                                                      |
| Target group                                                                                                                                                                                                                                                                                                                                                                                                                 | <ul style="list-style-type: none"> <li>Name (age) &lt;gender randomised &amp; age group equal to respondent&gt;</li> <li>Name (age) &lt;gender randomised &amp; age group not equal to respondent (randomised)&gt;.</li> </ul> Names: <ul style="list-style-type: none"> <li>(male first names) Franz, Martin, Stefan, Michael, Lukas, Maximilian, Thomas, Josef, Valentin, Jakob</li> <li>(female first names) Maria, Sabine, Daniela, Julia, Lena, Anna, Martina, Tanja, Erika, Sylvia</li> </ul> Age: <ul style="list-style-type: none"> <li>(14-24 years) 16 years, 21 years</li> <li>(25-34 years) 28 years, 32 years</li> <li>(35-44 years) 37 years, 43 years</li> <li>(45-54 years) 49 years, 54 years</li> <li>(55-64 years) 56 years, 63 years</li> <li>(65 + years) 67 years, 72 years</li> </ul> |
| Vaccination motivation ('Motiv') <ul style="list-style-type: none"> <li>Economic risk – sociotropic</li> <li>Economic risk - personal</li> <li>Health risk - Self-protection Recovered</li> <li>Health hazard - self-protection - severe course</li> <li>Health risk - external protection interpersonal</li> <li>Health risk - external protection collective</li> <li>Sense of community</li> <li>Self-efficacy</li> </ul> | <ul style="list-style-type: none"> <li>I don't want any more lockdowns! The shops and restaurants must stay open.</li> <li>I can't afford financially to get sick with Long Covid and not be able to work.</li> <li>I already had Corona and I don't want to have it again.</li> <li>I am afraid of a severe course of the disease. It can affect anyone.</li> <li>A friend of mine is a high-risk patient. I want to protect those around me.</li> <li>I want to protect the health system. The workload of health workers must be reduced.</li> <li>We should all stick together to overcome the crisis.</li> <li>We are not powerless in the face of the pandemic. Everyone can do something!</li> </ul>                                                                                                  |



**Table S6.2: German version**

| Attribute                                                                                                                                                                                                                                                                                                                                                                                                                                                                                                                          | Ausprägungen                                                                                                                                                                                                                                                                                                                                                                                                                                                                                                                                                                                                                                                                                                                                                                                                                                                                   |
|------------------------------------------------------------------------------------------------------------------------------------------------------------------------------------------------------------------------------------------------------------------------------------------------------------------------------------------------------------------------------------------------------------------------------------------------------------------------------------------------------------------------------------|--------------------------------------------------------------------------------------------------------------------------------------------------------------------------------------------------------------------------------------------------------------------------------------------------------------------------------------------------------------------------------------------------------------------------------------------------------------------------------------------------------------------------------------------------------------------------------------------------------------------------------------------------------------------------------------------------------------------------------------------------------------------------------------------------------------------------------------------------------------------------------|
| Virusvarianten <ul style="list-style-type: none"> <li>• <i>Decline</i></li> <li>• <i>No change</i></li> <li>• <i>Escalation</i></li> </ul>                                                                                                                                                                                                                                                                                                                                                                                         | <ul style="list-style-type: none"> <li>• die <u>weniger gefährlich</u> sind als die derzeitige Virusvariante.</li> <li>• die <u>ähnlich</u> sind wie die derzeitige Virusvariante.</li> <li>• die <u>gefährlicher</u> sind als die derzeitige Virusvariante.</li> </ul>                                                                                                                                                                                                                                                                                                                                                                                                                                                                                                                                                                                                        |
| Art des Impfstoffs <ul style="list-style-type: none"> <li>• <i>mRNA-Impfstoffe only</i></li> <li>• <i>mRNA-Impfstoffe und zusätzlich Totimpfstoffe</i></li> </ul>                                                                                                                                                                                                                                                                                                                                                                  | <ul style="list-style-type: none"> <li>• mRNA-Impfstoffe: BioNtech-Pfizer, Moderna</li> <li>• mRNA-Impfstoffe: BioNtech-Pfizer, Moderna<br/>Totimpfstoffe: Novavax, Valneva</li> </ul>                                                                                                                                                                                                                                                                                                                                                                                                                                                                                                                                                                                                                                                                                         |
| Anpassung an Omikron                                                                                                                                                                                                                                                                                                                                                                                                                                                                                                               | <ul style="list-style-type: none"> <li>• verfügbar</li> <li>• nicht verfügbar</li> </ul>                                                                                                                                                                                                                                                                                                                                                                                                                                                                                                                                                                                                                                                                                                                                                                                       |
| Incentives <ul style="list-style-type: none"> <li>• <i>kostenfrei</i></li> <li>• <i>nicht kostenfrei</i></li> <li>• <i>Sachprämie</i></li> <li>• <i>Geldprämie</i></li> </ul>                                                                                                                                                                                                                                                                                                                                                      | <ul style="list-style-type: none"> <li>• Die Impfung ist gratis.</li> <li>• Die Impfung kostet 20 Euro.</li> <li>• Für die Impfung erhalten Sie einen Einkaufsgutschein über 500 Euro als Aufwandsentschädigung.</li> <li>• Für die Impfung erhalten Sie 500 Euro als Aufwandsentschädigung.</li> </ul>                                                                                                                                                                                                                                                                                                                                                                                                                                                                                                                                                                        |
| Zielgruppe                                                                                                                                                                                                                                                                                                                                                                                                                                                                                                                         | <ul style="list-style-type: none"> <li>• Name (Alter) &lt;Geschlecht randomisiert &amp; Altersgruppe gleich befragter Person&gt;</li> <li>• Name (Alter) &lt;Geschlecht randomisiert &amp; Altersgruppe ungleich befragte Person (randomisiert)&gt;</li> </ul> <p>Namen:</p> <ul style="list-style-type: none"> <li>○ (männliche Vornamen) Franz, Martin, Stefan, Michael, Lukas, Maximilian, Thomas, Josef, Valentin, Jakob</li> <li>○ (weibliche Vornamen) Maria, Sabine, Daniela, Julia, Lena, Anna, Martina, Tanja, Erika, Sylvia</li> </ul> <p>Alter:</p> <ul style="list-style-type: none"> <li>○ (14-24 Jahre) 16 Jahre, 21 Jahre</li> <li>○ (25-34 Jahre) 28 Jahre, 32 Jahre</li> <li>○ (35-44 Jahre) 37 Jahre, 43 Jahre</li> <li>○ (45-54 Jahre) 49 Jahre, 54 Jahre</li> <li>○ (55-64 Jahre) 56 Jahre, 63 Jahre</li> <li>○ (65 + Jahre) 67 Jahre, 72 Jahre</li> </ul> |
| Impfmotivation <ul style="list-style-type: none"> <li>• <i>Wirtschaftliche Gefahr – soziotropisch</i></li> <li>• <i>Wirtschaftliche Gefahr – persönlich</i></li> <li>• <i>Gesundheitliche Gefahr - Selbstschutz Genesene</i></li> <li>• <i>Gesundheitliche Gefahr - Selbstschutz - schwerer Verlauf</i></li> <li>• <i>Gesundheitliche Gefahr - Fremdschutz interpersonal</i></li> <li>• <i>Gesundheitliche Gefahr - Fremdschutz kollektiv</i></li> <li>• <i>Gemeinschaftsgefühl</i></li> <li>• <i>Selbstwirksamkeit</i></li> </ul> | <ul style="list-style-type: none"> <li>• Ich will keine Lockdowns mehr! Die Geschäfte und Restaurants müssen offenbleiben.</li> <li>• Ich kann es mir finanziell nicht leisten, an Long Covid zu erkranken und nicht mehr arbeiten zu können.</li> <li>• Ich hatte schon Corona und will es nicht schon wieder haben.</li> <li>• Ich habe Angst vor einem schweren Krankheitsverlauf. Es kann jeden treffen.</li> <li>• Ein Freund von mir ist Risikopatient. Ich will mein Umfeld mitschützen.</li> <li>• Ich will das Gesundheitssystem schützen. Das Gesundheitspersonal muss entlastet werden.</li> <li>• Wir sollten alle zusammenhalten, um die Krise gemeinsam zu meistern.</li> <li>• Wir sind nicht machtlos gegenüber der Pandemie. Jeder kann was tun!</li> </ul>                                                                                                   |

**Table S6.3: Italian version**

| Attributi                                                                                                                                                                                                                                                                                                                                                                                                                                                                                                             | Espressioni                                                                                                                                                                                                                                                                                                                                                                                                                                                                                                                                                                                                                                                                                                                                                                                                                                                          |
|-----------------------------------------------------------------------------------------------------------------------------------------------------------------------------------------------------------------------------------------------------------------------------------------------------------------------------------------------------------------------------------------------------------------------------------------------------------------------------------------------------------------------|----------------------------------------------------------------------------------------------------------------------------------------------------------------------------------------------------------------------------------------------------------------------------------------------------------------------------------------------------------------------------------------------------------------------------------------------------------------------------------------------------------------------------------------------------------------------------------------------------------------------------------------------------------------------------------------------------------------------------------------------------------------------------------------------------------------------------------------------------------------------|
| Varianti di virus <ul style="list-style-type: none"> <li>• <i>Declino</i></li> <li>• <i>Nessuna variazione</i></li> <li>• <i>Escalation</i></li> </ul>                                                                                                                                                                                                                                                                                                                                                                | <ul style="list-style-type: none"> <li>• che sono <u>meno pericolose</u> dell'attuale variante del virus</li> <li>• che sono <u>simili</u> all'attuale variante del virus</li> <li>• che sono <u>più pericolose</u> dell'attuale variante del virus</li> </ul>                                                                                                                                                                                                                                                                                                                                                                                                                                                                                                                                                                                                       |
| Tipo di vaccino <ul style="list-style-type: none"> <li>• <i>Solo vaccini a mRNA</i></li> <li>• <i>vaccini a mRNA e vaccini inattivati aggiuntivi</i></li> </ul>                                                                                                                                                                                                                                                                                                                                                       | <ul style="list-style-type: none"> <li>• Vaccini a mRNA: BioNtech-Pfizer, Moderna</li> <li>• Vaccini a mRNA: BioNtech-Pfizer, Moderna</li> <li>• Vaccini inattivati: Novavax, Valneva</li> </ul>                                                                                                                                                                                                                                                                                                                                                                                                                                                                                                                                                                                                                                                                     |
| Adattamento a Omicron                                                                                                                                                                                                                                                                                                                                                                                                                                                                                                 | <ul style="list-style-type: none"> <li>• disponibile</li> <li>• non disponibile</li> </ul>                                                                                                                                                                                                                                                                                                                                                                                                                                                                                                                                                                                                                                                                                                                                                                           |
| Incentivi <ul style="list-style-type: none"> <li>• <i>gratuito</i></li> <li>• <i>non gratuito</i></li> <li>• <i>Premio in natura</i></li> <li>• <i>Premio in denaro</i></li> </ul>                                                                                                                                                                                                                                                                                                                                    | <ul style="list-style-type: none"> <li>• La vaccinazione è gratuita.</li> <li>• La vaccinazione costa 20 euro.</li> <li>• Per la vaccinazione riceve un buono spesa di 500 euro.</li> <li>• Per la vaccinazione riceve 500 euro in contanti come rimborso spese.</li> </ul>                                                                                                                                                                                                                                                                                                                                                                                                                                                                                                                                                                                          |
| Gruppo target                                                                                                                                                                                                                                                                                                                                                                                                                                                                                                         | <ul style="list-style-type: none"> <li>• Nome (età) &lt; sesso randomizzato e gruppo di età uguale a quello del rispondente &gt;.</li> <li>• Nome (età) &lt; sesso randomizzato e gruppo di età del rispondente non uguale (randomizzato) &gt;.</li> </ul> <p><i>Nomi:</i></p> <ul style="list-style-type: none"> <li>○ (nomi maschili) Franco, Martino, Stefano, Michele, Luca, Massimiliano, Tommaso, Giuseppe, Valentino, Jacopo</li> <li>○ (nomi femminili) Maria, Sabina, Daniela, Giulia, Lena, Anna, Martina, Tania, Erica, Silvia</li> </ul> <p><i>Età:</i></p> <ul style="list-style-type: none"> <li>○ (14-24 anni) 16 anni, 21 anni</li> <li>○ (25-34 anni) 28 anni, 32 anni</li> <li>○ (35-44 anni) 37 anni, 43 anni</li> <li>○ (45-54 anni) 49 anni, 54 anni</li> <li>○ (55-64 anni) 56 anni, 63 anni</li> <li>○ (65+ anni) 67 anni, 72 anni</li> </ul> |
| Motivazione alla vaccinazione <ul style="list-style-type: none"> <li>• <i>Rischio economico - sociotropico</i></li> <li>• <i>Rischio economico – personale</i></li> <li>• <i>Pericolo per la salute - Autoprotezione convalescenti</i></li> <li>• <i>Pericolo per la salute - autoprotezione - decorso grave</i></li> <li>• <i>Pericolo per la salute - protezione degli altri</i></li> <li>• <i>Pericolo per la salute - protezione per la popolazione generale</i></li> <li>• <i>Spirito comunitario</i></li> </ul> | <ul style="list-style-type: none"> <li>• Non voglio più lockdown! I negozi e i ristoranti devono rimanere aperti.</li> <li>• Non posso permettermi finanziariamente di ammalarmi di Long Covid e di non poter lavorare.</li> <li>• Ho già avuto il Covid-19 e non voglio averlo di nuovo.</li> <li>• Temo un decorso grave della malattia. Può colpire chiunque.</li> <li>• Un mio amico è un paziente ad alto rischio. Voglio proteggere coloro che mi circondano.</li> <li>• Voglio proteggere il sistema sanitario. Il carico di lavoro degli operatori sanitari deve essere ridotto.</li> <li>• Dovremmo essere tutti uniti per superare la crisi.</li> </ul>                                                                                                                                                                                                    |

| Attributi                                                                | Espressioni                                                                                                                   |
|--------------------------------------------------------------------------|-------------------------------------------------------------------------------------------------------------------------------|
| <ul style="list-style-type: none"> <li>• <i>Autoefficacia</i></li> </ul> | <ul style="list-style-type: none"> <li>• Non siamo impotenti di fronte alla pandemia. Tutti possono fare qualcosa!</li> </ul> |

## Supplemental File 7. Details on experiment 2 – Media communication on vaccinations

Experiment 2 was designed to assess scenarios of hypothetical media coverage on vaccinations. Recent research has demonstrated the importance of communicating expert consensus to increase vaccinations. Yet, media coverage usually tries to balance perspectives, even when there is far-reaching consensus (“false balance”). We therefore included fictional reports about a TV discussion round as an attribute in the experiment. Previous research also suggested that celebrity endorsement might play a role. As recent coverage on vaccination included both celebrities endorsing vaccinations, but also opposition to vaccination by celebrities to vaccinations, we include a brief fictional report on celebrity behaviour. The discussion with public health experts further revealed that there was great uncertainty about the risks of Long COVID. We therefore included an attribute varying the prevalence of Long COVID. Finally, previous research has shown that legal rules such as vaccine passports and vaccine mandates may matter for vaccinations. To evaluate whether such instruments would be suitable to increase vaccinations, we included an attribute for the requirement of a vaccine passport and two kind of vaccine mandates. The wording of all attributes and levels are listed at the end of this file (see Table S7.1: English translation, Table S7.2: Original version in German, Table S7.3: Original version in Italian).

The introductory sentence for the experiment read as follows: “In the following we show you some made-up media reports on vaccination against COVID-19. These are fictional scenarios in each case.” Respondents were then shown two media reports at a time and were asked to answer two follow-up questions (Q3, Q4). Levels were randomly assigned with equal probabilities and repeatedly recombined, with all combinations being plausible and realistic. The procedure was repeated twice so that each respondent had to evaluate four scenarios in total.

| Media Report 1                                                                                                                                                                                                                                         | Media Report 2                                                                                                                                                                                                                                         |
|--------------------------------------------------------------------------------------------------------------------------------------------------------------------------------------------------------------------------------------------------------|--------------------------------------------------------------------------------------------------------------------------------------------------------------------------------------------------------------------------------------------------------|
| TV discussion:<br>The talk show on the topic "Should we vaccinate ourselves (again)?" featured guests <Cons, 1 of 4>.                                                                                                                                  | TV discussion:<br>The talk show on the topic "Should we vaccinate ourselves (again)?" featured guests <Cons, 1 of 4>.                                                                                                                                  |
| Celebrity Newsflash:<br>< Celeb, 1 of 4>                                                                                                                                                                                                               | Celebrity Newsflash:<br>< Celeb, 1 of 4>                                                                                                                                                                                                               |
| Science:<br>A new study has investigated the incidence of Long Covid. According to the study, <LongCo, 1 in 4> suffer from Long Covid symptoms and were off work sick for more than 4 weeks. Vaccination reduces the risk of Long Covid by 50 percent. | Science:<br>A new study has investigated the incidence of Long Covid. According to the study, <LongCo, 1 in 4> suffer from Long Covid symptoms and were off work sick for more than 4 weeks. Vaccination reduces the risk of Long Covid by 50 percent. |
| Current Corona Rules:<br>A valid vaccination certificate will <GreenPa, 1 of 2>.                                                                                                                                                                       | Current Corona Rules:<br>A valid vaccination certificate will <GreenPa, 1 of 2>.                                                                                                                                                                       |
| Mandatory vaccination:<br><Mand, 1 of 3>                                                                                                                                                                                                               | Mandatory vaccination:<br><Mand, 1 of 3>                                                                                                                                                                                                               |

Q3. Please read these two media reports carefully.

Based on which media report would you be more likely to trust vaccination against COVID-19? Please spontaneously choose one if neither or both media reports give an equally trustworthy impression. (Binary choice)

- Media report 1
- Media report 2

Q4. On a scale of 0 to 10, how likely is it that you would get vaccinated against COVID-19 given these media reports? (Rating scale)

- Media report 1: 0 = “would definitely not get vaccinated” to 10 “would definitely get vaccinated”
- Media report 2: 0 = “would definitely not get vaccinated” to 10 “would definitely get vaccinated”

**Table S7.1: English version**

| Attributes                                                                                                                                                                                                                                     | Levels                                                                                                                                                                                                                                                                                                                                                                                                                                                                                                                                                                                                                                                                                                                                                                                                                                                                                                                                                                                                                                                                                                                                                                                                                                                                                                                                                                                                                         |
|------------------------------------------------------------------------------------------------------------------------------------------------------------------------------------------------------------------------------------------------|--------------------------------------------------------------------------------------------------------------------------------------------------------------------------------------------------------------------------------------------------------------------------------------------------------------------------------------------------------------------------------------------------------------------------------------------------------------------------------------------------------------------------------------------------------------------------------------------------------------------------------------------------------------------------------------------------------------------------------------------------------------------------------------------------------------------------------------------------------------------------------------------------------------------------------------------------------------------------------------------------------------------------------------------------------------------------------------------------------------------------------------------------------------------------------------------------------------------------------------------------------------------------------------------------------------------------------------------------------------------------------------------------------------------------------|
| Consensus ('Cons') <ul style="list-style-type: none"> <li>• <i>Consensus doctors</i></li> <li>• <i>Consensus science</i></li> <li>• <i>False Balance Doctors</i></li> <li>• <i>False Balance Scientists</i></li> </ul>                         | <ul style="list-style-type: none"> <li>• Doctors A and B., both physicians. They agreed that the vaccines are safe and effective and called on the population to vaccinate. A representative survey by the Medical Association with more than 10,000 respondents shows that 90% of doctors trust the approved vaccines.</li> <li>• The immunologist Prof. Dr. E and the infectiologist Prof. Dr. F. Both scientists, agreed that the vaccines are safe and effective and called on the population to vaccinate. A representative survey of the professional societies for immunology and infectiology with over 1000 respondents shows that 99% of the scientists trust the approved vaccines.</li> <li>• Doctors C and D. Dr. C was of the opinion that the vaccines were safe and effective and called for vaccination. Dr. D, on the other hand, expressed doubts about the safety and effectiveness of the vaccines and did not recommend vaccination. The debate was controversial and ended without a clear outcome.</li> <li>• The infectiologist Prof. Dr. G and the microbiologist Prof. Dr. H. Prof. Dr. G was of the opinion that the vaccines were safe and effective and called for vaccination. Prof. Dr. H, on the other hand, expressed doubts about the safety and effectiveness of the vaccines and did not recommend vaccination. The debate was controversial and ended without a clear result.</li> </ul> |
| Celebrities ('Celeb') <ul style="list-style-type: none"> <li>• <i>Celebrity falls ill</i></li> <li>• <i>Celebrity refuses vaccination</i></li> <li>• <i>Celebrity vaccinated</i></li> <li>• <i>Celebrity waits for new vaccines</i></li> </ul> | <ul style="list-style-type: none"> <li>• Tennis player J: "It would have been better to have had me vaccinated earlier". Due to infiltrations in the lungs after a COVID infection, J is out for the rest of the year.</li> <li>• Football player K: "I stand by the no to vaccination". K renounces participation in the tournament because entry into the host country is currently not possible without a vaccination certificate.</li> <li>• Singer L: "I am already vaccinated and appeal to all my fans to do the same". L is planning a big tour all over Europe in autumn.</li> <li>• Actress M: "I'm waiting for the new vaccines". The shooting of M's new film is postponed until next year.</li> </ul>                                                                                                                                                                                                                                                                                                                                                                                                                                                                                                                                                                                                                                                                                                             |
| Long Covid ('LongCo')                                                                                                                                                                                                                          | <ul style="list-style-type: none"> <li>• 1 percent of the infected</li> <li>• 5 percent of the infected</li> <li>• 10 per cent of the infected</li> <li>• 20 per cent of those infected</li> </ul>                                                                                                                                                                                                                                                                                                                                                                                                                                                                                                                                                                                                                                                                                                                                                                                                                                                                                                                                                                                                                                                                                                                                                                                                                             |
| Green passport ('GreenPa')                                                                                                                                                                                                                     | <ul style="list-style-type: none"> <li>• no longer needed.</li> <li>• needed again in many areas.</li> </ul>                                                                                                                                                                                                                                                                                                                                                                                                                                                                                                                                                                                                                                                                                                                                                                                                                                                                                                                                                                                                                                                                                                                                                                                                                                                                                                                   |
| Vaccine mandate ('Mand')                                                                                                                                                                                                                       | <ul style="list-style-type: none"> <li>• There is no compulsory vaccination.</li> <li>• Compulsory vaccination applies from the age of 50 with a fine of 100 euros.</li> <li>• Vaccination is compulsory from the age of 18 with a fine of 1500 euros.</li> </ul>                                                                                                                                                                                                                                                                                                                                                                                                                                                                                                                                                                                                                                                                                                                                                                                                                                                                                                                                                                                                                                                                                                                                                              |

**Table S7.2: German version**

| Attribute                                                                                                                                                                                              | Ausprägungen                                                                                                                                                                                                                                                                                                                                                                                                                                                                                                                                                                                                                                                                                                                                                                                                                                                                                                                                                                                                                                                                                                                                                                                                                                                                                                                                                                                                                                                                                                             |
|--------------------------------------------------------------------------------------------------------------------------------------------------------------------------------------------------------|--------------------------------------------------------------------------------------------------------------------------------------------------------------------------------------------------------------------------------------------------------------------------------------------------------------------------------------------------------------------------------------------------------------------------------------------------------------------------------------------------------------------------------------------------------------------------------------------------------------------------------------------------------------------------------------------------------------------------------------------------------------------------------------------------------------------------------------------------------------------------------------------------------------------------------------------------------------------------------------------------------------------------------------------------------------------------------------------------------------------------------------------------------------------------------------------------------------------------------------------------------------------------------------------------------------------------------------------------------------------------------------------------------------------------------------------------------------------------------------------------------------------------|
| Konsens <ul style="list-style-type: none"> <li><i>Konsens Ärzte</i></li> <li><i>Konsens Wissenschaft</i></li> <li><i>False Balance Ärzte</i></li> <li><i>False Balance Wissenschaftler</i></li> </ul>  | <ul style="list-style-type: none"> <li>Die Ärzte Dr. A und Dr. B. Beide Mediziner waren sich einig, dass die Impfstoffe sicher und effektiv sind, und riefen die Bevölkerung zur Impfung auf. Eine repräsentative Umfrage der Ärztekammer mit über 10.000 Befragten zeigt, dass 90% der Ärztinnen und Ärzte den zugelassenen Impfstoffen vertrauen.</li> <li>Der Immunologe Prof. Dr. E und der Infektiologe Prof. Dr. F. Beide Wissenschaftler waren sich einig, dass die Impfstoffe sicher und effektiv sind, und riefen die Bevölkerung zur Impfung auf. Eine repräsentative Befragung der Fachgesellschaften für Immunologie und Infektiologie mit über 1000 Befragten zeigt, dass 99% der Wissenschaftlerinnen und Wissenschaftlern den zugelassenen Impfstoffen vertrauen.</li> <li>Die Ärzte Dr. C und Dr. D. Dr. C vertrat die Meinung, dass die Impfstoffe sicher und effektiv seien und rief zur Impfung auf. Dr. D hingegen äußerte Zweifel in Bezug auf die Sicherheit und Wirksamkeit der Impfstoffe und sprach keine Impfeempfehlung aus. Die Debatte war kontrovers und endete ohne ein klares Ergebnis.</li> <li>Der Infektiologe Prof. Dr. G und der Mikrobiologe Prof. Dr. H. Prof Dr. G vertrat die Meinung, dass die Impfstoffe sicher und effektiv seien und rief zur Impfung auf. Prof. Dr. H hingegen äußerte Zweifel in Bezug auf die Sicherheit und Wirksamkeit der Impfstoffe und sprach keine Impfeempfehlung aus. Die Debatte war kontrovers und endete ohne ein klares Ergebnis.</li> </ul> |
| Promis <ul style="list-style-type: none"> <li><i>Promi erkrankt</i></li> <li><i>Promi verweigert Impfung</i></li> <li><i>Promi geimpft</i></li> <li><i>Promi wartet auf neue Impfstoffe</i></li> </ul> | <ul style="list-style-type: none"> <li>Tennisspielerin J: "Es wäre besser gewesen, mich früher impfen zu lassen". Aufgrund von Infiltrationen in der Lunge nach einer COVID-Infektion fällt J für den Rest des Jahres aus.</li> <li>Fußballspieler K: "Ich bleibe beim Nein zur Impfung". K verzichtet auf die Teilnahme am Turnier, da die Einreise ins Austragungsland ohne Impfsertifikat derzeit nicht möglich ist.</li> <li>Sänger L: "Ich bin schon geimpft und appelliere an all meine Fans, das auch zu tun". L plant eine große Tournee im Herbst durch ganz Europa.</li> <li>Schauspielerin M: "Ich warte auf die neuen Impfstoffe". Die Dreharbeiten für M's neuen Film verschieben sich auf das nächste Jahr.</li> </ul>                                                                                                                                                                                                                                                                                                                                                                                                                                                                                                                                                                                                                                                                                                                                                                                     |
| Long Covid                                                                                                                                                                                             | <ul style="list-style-type: none"> <li>1 Prozent der Infizierten</li> <li>5 Prozent der Infizierten</li> <li>10 Prozent der Infizierten</li> <li>20 Prozent der Infizierten</li> </ul>                                                                                                                                                                                                                                                                                                                                                                                                                                                                                                                                                                                                                                                                                                                                                                                                                                                                                                                                                                                                                                                                                                                                                                                                                                                                                                                                   |
| Grüner Pass                                                                                                                                                                                            | <ul style="list-style-type: none"> <li>nicht mehr benötigt.</li> <li>in vielen Bereichen wieder benötigt.</li> </ul>                                                                                                                                                                                                                                                                                                                                                                                                                                                                                                                                                                                                                                                                                                                                                                                                                                                                                                                                                                                                                                                                                                                                                                                                                                                                                                                                                                                                     |
| Impfpflicht                                                                                                                                                                                            | <ul style="list-style-type: none"> <li>Es gilt keine Impfpflicht.</li> <li>Es gilt eine Impfpflicht ab 50 Jahre mit einer Geldstrafe von 100 Euro.</li> <li>Es gilt eine Impfpflicht ab 18 Jahre mit einer Geldstrafe von 1500 Euro.</li> </ul>                                                                                                                                                                                                                                                                                                                                                                                                                                                                                                                                                                                                                                                                                                                                                                                                                                                                                                                                                                                                                                                                                                                                                                                                                                                                          |

**Table S7.3: Italian version**

| Attributi                                                                            | Espressioni                                                                                                                                                                                                 |
|--------------------------------------------------------------------------------------|-------------------------------------------------------------------------------------------------------------------------------------------------------------------------------------------------------------|
| Consenso <ul style="list-style-type: none"> <li><i>Medici di consenso</i></li> </ul> | <ul style="list-style-type: none"> <li>i medici Dr. A e Dr. B. Entrambi i medici concordano sul fatto che i vaccini sono sicuri ed efficaci e invitano la popolazione a vaccinarsi. Un sondaggio</li> </ul> |

| Attributi                                                                                                                                                                                                                                                | Espressioni                                                                                                                                                                                                                                                                                                                                                                                                                                                                                                                                                                                                                                                                                                                                                                                                                                                                                                                                                                                                                                                                                                                                                                                                                                                                                   |
|----------------------------------------------------------------------------------------------------------------------------------------------------------------------------------------------------------------------------------------------------------|-----------------------------------------------------------------------------------------------------------------------------------------------------------------------------------------------------------------------------------------------------------------------------------------------------------------------------------------------------------------------------------------------------------------------------------------------------------------------------------------------------------------------------------------------------------------------------------------------------------------------------------------------------------------------------------------------------------------------------------------------------------------------------------------------------------------------------------------------------------------------------------------------------------------------------------------------------------------------------------------------------------------------------------------------------------------------------------------------------------------------------------------------------------------------------------------------------------------------------------------------------------------------------------------------|
| <ul style="list-style-type: none"> <li>● <i>Scienza del consenso</i></li> <li>● <i>Falso Equilibrio Medici</i></li> <li>● <i>Scienziati in falso equilibrio</i></li> </ul>                                                                               | <p>rappresentativo dell'Associazione Medica con più di 10.000 intervistati mostra che il 90% dei medici si fida dei vaccini approvati.</p> <ul style="list-style-type: none"> <li>● l'immunologo Prof. Dr. E e l'infettivologo Prof. Dr. F. Entrambi gli scienziati sono d'accordo che i vaccini sono sicuri ed efficaci e hanno invitato la popolazione a vaccinarsi. Un sondaggio rappresentativo delle società professionali di immunologia e infettivologia con oltre 1.000 intervistati mostra che il 99% degli scienziati si fida dei vaccini approvati.</li> <li>● i medici Dr. I e Dr. J. Il dottor I era del parere che i vaccini fossero sicuri ed efficaci e ha invitato a vaccinarsi. Il dottor J, invece, ha espresso dubbi sulla sicurezza e sull'efficacia dei vaccini e non ha consigliato la vaccinazione. Il dibattito era controverso e si è concluso senza un esito chiaro.</li> <li>● l'infettivologo Prof. Dr. G e il microbiologo Prof. Dr. H. Il Professor G era del parere che i vaccini fossero sicuri ed efficaci e ha invitato alla vaccinazione. Il Professor H, invece, ha espresso dubbi sulla sicurezza e sull'efficacia dei vaccini e non ha consigliato la vaccinazione. Il dibattito era controverso e si è concluso senza un risultato chiaro.</li> </ul> |
| <p>Celebrità</p> <ul style="list-style-type: none"> <li>● <i>Una celebrità si ammala</i></li> <li>● <i>Una celebrità rifiuta la vaccinazione</i></li> <li>● <i>Celebrità vaccinate</i></li> <li>● <i>Celebrità in attesa di nuovi vaccini</i></li> </ul> | <ul style="list-style-type: none"> <li>● Il tennista J: "Sarebbe stato meglio farmi vaccinare prima". A causa di danni ai polmoni dopo un'infezione da Covid-19, J è fuori per il resto dell'anno.</li> <li>● Il giocatore di calcio K: "Sostengo il no alla vaccinazione". K rinuncia a partecipare al torneo perché l'ingresso nel Paese ospitante non è attualmente possibile senza un certificato di vaccinazione.</li> <li>● La cantante L: "Sono già vaccinata e chiedo a tutti i miei fan di fare lo stesso". L ha in programma un grande tour in tutta Europa in autunno.</li> <li>● Attrice M: "Aspetto i nuovi vaccini". Le riprese del nuovo film di M sono rimandate al prossimo anno.</li> </ul>                                                                                                                                                                                                                                                                                                                                                                                                                                                                                                                                                                                 |
| Long Covid                                                                                                                                                                                                                                               | <ul style="list-style-type: none"> <li>● 5 percento degli infetti</li> <li>● 10 percento degli infetti</li> <li>● 20 percento degli infetti</li> <li>● L'1 percento degli infetti</li> </ul>                                                                                                                                                                                                                                                                                                                                                                                                                                                                                                                                                                                                                                                                                                                                                                                                                                                                                                                                                                                                                                                                                                  |
| Passaporto verde                                                                                                                                                                                                                                         | <ul style="list-style-type: none"> <li>● non è più necessario.</li> <li>● necessario in molti settori.</li> </ul>                                                                                                                                                                                                                                                                                                                                                                                                                                                                                                                                                                                                                                                                                                                                                                                                                                                                                                                                                                                                                                                                                                                                                                             |
| Vaccinazione obbligatoria                                                                                                                                                                                                                                | <ul style="list-style-type: none"> <li>● Non esiste una vaccinazione obbligatoria.</li> <li>● La vaccinazione obbligatoria si applica a partire dai 50 anni di età con una multa di 100 euro.</li> <li>● La vaccinazione è obbligatoria a partire dai 18 anni con una multa di 1.500 euro.</li> </ul>                                                                                                                                                                                                                                                                                                                                                                                                                                                                                                                                                                                                                                                                                                                                                                                                                                                                                                                                                                                         |

## Supplemental File 8. Details on how we dealt with missing values

Respondents were required to answer the questions on the conjoint experiments in order to complete the interview. For the binary choice questions respondents were instructed to choose spontaneously one of the two options if they felt indifferent. Therefore, there are no missing values on our outcome variable. The questions that were included in the survey for descriptive purposes such as sociodemographics, measures of trust and emotions offered opt-out options (“Don’t know”, “No answer”). When calculating descriptive statistics, such responses were excluded from the analysis.



Supplemental File 9. Effects on the evaluation of the campaign by country (experiment 1)

| Sub-group | Attribute | Levels         | Est.     | SE      | z         | p                   | 95% Confidence interval |          |
|-----------|-----------|----------------|----------|---------|-----------|---------------------|-------------------------|----------|
|           |           |                |          |         |           |                     | lower                   | upper    |
| AT        | Variant   | No change      | 0        |         |           |                     |                         |          |
|           |           | Escalation     | 0.02148  | 0.01078 | 1.99256   | <b>0.04631</b>      | 0.00035                 | 0.04261  |
|           |           | Decline        | -0.04928 | 0.01063 | -4.63419  | <b>&lt;0.00001*</b> | -0.07012                | -0.02844 |
|           | Vacc      | mRNA_only      | 0        |         |           |                     |                         |          |
|           |           | mRNA+Inactive  | 0.02754  | 0.00869 | 3.17065   | <b>0.00152*</b>     | 0.01052                 | 0.04457  |
|           | Omic      | not_adap       | 0        |         |           |                     |                         |          |
|           |           | adap           | 0.08013  | 0.00877 | 9.13218   | <b>&lt;0.00001*</b> | 0.06293                 | 0.09732  |
|           | Incen     | Free           | 0        |         |           |                     |                         |          |
|           |           | Not_free       | -0.17618 | 0.01245 | -14.15312 | <b>&lt;0.00001*</b> | -0.20058                | -0.15178 |
|           |           | Cash           | 0.04008  | 0.01268 | 3.16179   | <b>0.00157*</b>     | 0.01523                 | 0.06492  |
|           | Motiv     | Non_cash       | 0.01121  | 0.01268 | 0.88416   | 0.37661             | -0.01364                | 0.03606  |
|           |           | Infect_Ego     | 0        |         |           |                     |                         |          |
|           |           | Econ_Ego       | 0.00839  | 0.01736 | 0.48325   | 0.62892             | -0.02564                | 0.04242  |
|           |           | Serious_Ego    | 0.05191  | 0.01731 | 2.99940   | <b>0.00271*</b>     | 0.01799                 | 0.08584  |
|           |           | Community      | 0.04178  | 0.01760 | 2.37430   | <b>0.01758</b>      | 0.00729                 | 0.07626  |
|           |           | Serious_Friend | 0.03618  | 0.01739 | 2.08088   | <b>0.03744</b>      | 0.00210                 | 0.07026  |
|           |           | Efficacy_Ego   | 0.03827  | 0.01730 | 2.21221   | <b>0.02695</b>      | 0.00436                 | 0.07218  |
|           |           | Econ_Socio     | 0.03097  | 0.01754 | 1.76515   | 0.07754             | -0.00342                | 0.06535  |
|           |           | Health_System  | 0.04387  | 0.01746 | 2.51257   | <b>0.01199</b>      | 0.00965                 | 0.07808  |
| IT        | Variant   | No change      | 0        |         |           |                     |                         |          |
|           |           | Escalation     | 0.00561  | 0.01092 | 0.51396   | 0.60728             | -0.01579                | 0.02701  |
|           |           | Decline        | -0.00796 | 0.01076 | -0.73971  | 0.45948             | -0.02904                | 0.01313  |
|           | Vacc      | mRNA_only      | 0        |         |           |                     |                         |          |
|           |           | mRNA+Inactive  | 0.00588  | 0.00898 | 0.65469   | 0.51266             | -0.01172                | 0.02347  |
|           | Omic      | not_adap       | 0        |         |           |                     |                         |          |
|           |           | adap           | 0.07371  | 0.00890 | 8.28187   | <b>&lt;0.00001*</b> | 0.05626                 | 0.09115  |
|           | Incen     | Free           | 0        |         |           |                     |                         |          |
|           |           | Not_free       | -0.14653 | 0.01232 | -11.89637 | <b>&lt;0.00001*</b> | -0.17067                | -0.12239 |
|           |           | Cash           | -0.01637 | 0.01280 | -1.27911  | 0.20086             | -0.04145                | 0.00871  |
|           | Motiv     | Non_cash       | -0.01567 | 0.01268 | -1.23578  | 0.21654             | -0.04051                | 0.00918  |
|           |           | Infect_Ego     | 0        |         |           |                     |                         |          |
|           |           | Econ_Ego       | 0.00258  | 0.01769 | 0.14565   | 0.88420             | -0.03210                | 0.03725  |
|           |           | Serious_Ego    | 0.01439  | 0.01781 | 0.80789   | 0.41916             | -0.02052                | 0.04931  |
|           |           | Community      | 0.03924  | 0.01754 | 2.23798   | <b>0.02522</b>      | 0.00488                 | 0.07361  |
|           |           | Serious_Friend | 0.04365  | 0.01776 | 2.45810   | <b>0.01397</b>      | 0.00884                 | 0.07845  |
|           |           | Efficacy_Ego   | 0.03644  | 0.01777 | 2.05106   | <b>0.04026</b>      | 0.00162                 | 0.07126  |
|           |           | Econ_Socio     | 0.03642  | 0.01755 | 2.07557   | <b>0.03793</b>      | 0.00203                 | 0.07082  |
|           |           | Health_System  | 0.05150  | 0.01770 | 2.91049   | <b>0.00361</b>      | 0.01682                 | 0.08619  |

Notes: Estimates are Average Marginal Component Effects (AMCEs). The Bonferroni corrected significance level is 0.0031. Significant p-values are marked with (in bold and with a \*) and without Bonferroni correction (in bold).

Supplemental File 10. Effects on the likelihood to get vaccinated by country (experiment 1)

| Sub-group | Attribute | Levels         | Est.     | SE      | z        | p                   | 95% Confidence interval |          |
|-----------|-----------|----------------|----------|---------|----------|---------------------|-------------------------|----------|
|           |           |                |          |         |          |                     | lower                   | upper    |
| AT        | Variant   | No change      | 0        |         |          |                     |                         |          |
|           |           | Escalation     | 0.12837  | 0.07850 | 1.63531  | 0.10198             | -0.02549                | 0.28223  |
|           |           | Decline        | -0.11292 | 0.07621 | -1.48181 | 0.13839             | -0.26228                | 0.03644  |
|           | Vacc      | mRNA_only      | 0        |         |          |                     |                         |          |
|           |           | mRNA+Inactive  | -0.04691 | 0.06549 | -0.71630 | 0.47381             | -0.17527                | 0.08145  |
|           | Omic      | not_adap       | 0        |         |          |                     |                         |          |
|           |           | adap           | 0.25619  | 0.06691 | 3.82883  | <b>0.00013*</b>     | 0.12505                 | 0.38733  |
|           | Incen     | Free           | 0        |         |          |                     |                         |          |
|           |           | Not_free       | -0.50484 | 0.09353 | -5.39740 | <b>&lt;0.00001*</b> | -0.68817                | -0.32152 |
|           |           | Cash           | 0.30662  | 0.09180 | 3.34003  | <b>0.00084*</b>     | 0.12669                 | 0.48654  |
|           |           | Non_cash       | 0.38445  | 0.09484 | 4.05380  | <b>0.00005*</b>     | 0.19857                 | 0.57033  |
|           | Motiv     | Infect_Ego     | 0        |         |          |                     |                         |          |
|           |           | Econ_Ego       | 0.01050  | 0.12866 | 0.08158  | 0.93498             | -0.24167                | 0.26266  |
|           |           | Serious_Ego    | 0.19628  | 0.13055 | 1.50346  | 0.13272             | -0.05960                | 0.45216  |
|           |           | Community      | 0.09315  | 0.12816 | 0.72678  | 0.46736             | -0.15805                | 0.34434  |
|           |           | Serious_Friend | -0.10693 | 0.13147 | -0.81330 | 0.41604             | -0.36462                | 0.15076  |
|           |           | Efficacy_Ego   | 0.05195  | 0.13122 | 0.39590  | 0.69218             | -0.20524                | 0.30915  |
|           |           | Econ_Socio     | 0.12793  | 0.12765 | 1.00218  | 0.31626             | -0.12226                | 0.37811  |
|           |           | Health_System  | 0.03043  | 0.13096 | 0.23237  | 0.81625             | -0.22624                | 0.28710  |
| IT        | Variant   | No change      | 0        |         |          |                     |                         |          |
|           |           | Escalation     | -0.04795 | 0.06546 | -0.73260 | 0.46380             | -0.17625                | 0.08034  |
|           |           | Decline        | -0.09072 | 0.06660 | -1.36228 | 0.17311             | -0.22125                | 0.03980  |
|           | Vacc      | mRNA_only      | 0        |         |          |                     |                         |          |
|           |           | mRNA+Inactive  | 0.00983  | 0.05368 | 0.18312  | 0.85470             | -0.09538                | 0.11504  |
|           | Omic      | not_adap       | 0        |         |          |                     |                         |          |
|           |           | adap           | 0.11514  | 0.05525 | 2.08415  | <b>0.03715</b>      | 0.00686                 | 0.22343  |
|           | Incen     | Free           | 0        |         |          |                     |                         |          |
|           |           | Not_free       | -0.64739 | 0.07823 | -8.27507 | <b>&lt;0.00001*</b> | -0.80073                | -0.49406 |
|           |           | Cash           | 0.06529  | 0.07927 | 0.82368  | 0.41012             | -0.09008                | 0.22067  |
|           |           | Non_cash       | 0.12289  | 0.07651 | 1.60633  | 0.10820             | -0.02706                | 0.27284  |
|           | Motiv     | Infect_Ego     | 0        |         |          |                     |                         |          |
|           |           | Econ_Ego       | -0.10267 | 0.10754 | -0.95472 | 0.33972             | -0.31345                | 0.10811  |
|           |           | Serious_Ego    | 0.01631  | 0.10863 | 0.15012  | 0.88067             | -0.19660                | 0.22921  |
|           |           | Community      | 0.09134  | 0.10987 | 0.83130  | 0.40580             | -0.12401                | 0.30669  |
|           |           | Serious_Friend | -0.06974 | 0.10799 | -0.64580 | 0.51841             | -0.28140                | 0.14192  |
|           |           | Efficacy_Ego   | -0.04882 | 0.10640 | -0.45880 | 0.64638             | -0.25736                | 0.15973  |
|           |           | Econ_Socio     | -0.00264 | 0.10679 | -0.02472 | 0.98028             | -0.21194                | 0.20666  |
|           |           | Health_System  | 0.09911  | 0.10877 | 0.91118  | 0.36220             | -0.11408                | 0.31230  |

Notes: Estimates are Average Marginal Component Effects (AMCEs). The Bonferroni corrected significance level is 0.0031. Significant p-values are marked with (in bold and with a \*) and without Bonferroni correction (in bold).

Supplemental File 11. Effects on the evaluation of the campaign by vaccination status (experiment 1)

| Sub-group | Attribute | Levels         | Est.     | SE      | z        | p                   | 95% Confidence interval |          |
|-----------|-----------|----------------|----------|---------|----------|---------------------|-------------------------|----------|
|           |           |                |          |         |          |                     | lower                   | upper    |
| Not       | Variant   | No change      | 0        |         |          |                     |                         |          |
|           |           | Escalation     | -0.01091 | 0.01548 | -0.70450 | 0.48112             | -0.04126                | 0.01944  |
|           |           | Decline        | 0.00129  | 0.01539 | 0.08357  | 0.93340             | -0.02889                | 0.03146  |
|           | Vacc      | mRNA_only      | 0        |         |          |                     |                         |          |
|           |           | mRNA+Inactive  | 0.04483  | 0.01289 | 3.47692  | <b>0.00051*</b>     | 0.01956                 | 0.07011  |
|           | Omic      | not_adap       | 0        |         |          |                     |                         |          |
|           |           | adap           | 0.03528  | 0.01280 | 2.75591  | <b>0.00585</b>      | 0.01019                 | 0.06036  |
|           | Incen     | Free           | 0        |         |          |                     |                         |          |
|           |           | Not_free       | -0.09397 | 0.01798 | -5.22532 | <b>&lt;0.00001*</b> | -0.12921                | -0.05872 |
|           |           | Cash           | -0.03598 | 0.01789 | -2.01166 | <b>0.04426</b>      | -0.07104                | -0.00092 |
|           |           | Non_cash       | -0.03283 | 0.01783 | -1.84122 | 0.06559             | -0.06778                | 0.00212  |
|           | Motiv     | Infect_Ego     | 0        |         |          |                     |                         |          |
|           |           | Econ_Ego       | 0.02856  | 0.02461 | 1.16014  | 0.24599             | -0.01969                | 0.07680  |
|           |           | Serious_Ego    | 0.02069  | 0.02451 | 0.84446  | 0.39841             | -0.02734                | 0.06873  |
|           |           | Community      | 0.06948  | 0.02452 | 2.83415  | <b>0.00459*</b>     | 0.02143                 | 0.11753  |
|           |           | Serious_Friend | 0.05587  | 0.02454 | 2.27655  | <b>0.02281</b>      | 0.00777                 | 0.10397  |
|           |           | Efficacy_Ego   | 0.04753  | 0.02452 | 1.93867  | 0.05254             | -0.00052                | 0.09558  |
|           |           | Econ_Socio     | 0.05230  | 0.02511 | 2.08281  | <b>0.03727</b>      | 0.00308                 | 0.10151  |
|           |           | Health_System  | 0.05215  | 0.02459 | 2.12021  | <b>0.03399</b>      | 0.00394                 | 0.10035  |
| 1 or 2    | Variant   | No change      | 0        |         |          |                     |                         |          |
|           |           | Escalation     | 0.05157  | 0.02027 | 2.54379  | <b>0.01097</b>      | 0.01184                 | 0.09130  |
|           |           | Decline        | -0.01863 | 0.01983 | -0.93962 | 0.34741             | -0.05749                | 0.02023  |
|           | Vacc      | mRNA_only      | 0        |         |          |                     |                         |          |
|           |           | mRNA+Inactive  | 0.03714  | 0.01633 | 2.27399  | <b>0.02297</b>      | 0.00513                 | 0.06915  |
|           | Omic      | not_adap       | 0        |         |          |                     |                         |          |
|           |           | adap           | 0.05556  | 0.01612 | 3.44766  | <b>0.00057*</b>     | 0.02397                 | 0.08714  |
|           | Incen     | Free           | 0        |         |          |                     |                         |          |
|           |           | Not_free       | -0.15572 | 0.02312 | -6.73551 | <b>&lt;0.00001*</b> | -0.20104                | -0.11041 |
|           |           | Cash           | 0.10531  | 0.02405 | 4.37903  | <b>0.00001*</b>     | 0.05817                 | 0.15244  |
|           |           | Non_cash       | 0.04374  | 0.02406 | 1.81806  | 0.06906             | -0.00341                | 0.09090  |
|           | Motiv     | Infect_Ego     | 0        |         |          |                     |                         |          |
|           |           | Econ_Ego       | 0.00299  | 0.03459 | 0.08638  | 0.93116             | -0.06481                | 0.07079  |
|           |           | Serious_Ego    | -0.01688 | 0.03419 | -0.49379 | 0.62145             | -0.08390                | 0.05013  |
|           |           | Community      | -0.01836 | 0.03442 | -0.53324 | 0.59386             | -0.08583                | 0.04911  |
|           |           | Serious_Friend | 0.01445  | 0.03347 | 0.43175  | 0.66593             | -0.05115                | 0.08005  |
|           |           | Efficacy_Ego   | 0.02422  | 0.03497 | 0.69262  | 0.48855             | -0.04432                | 0.09277  |
|           |           | Econ_Socio     | 0.00870  | 0.03413 | 0.25505  | 0.79868             | -0.05819                | 0.07560  |
|           |           | Health_System  | 0.01922  | 0.03420 | 0.56192  | 0.57417             | -0.04781                | 0.08625  |
| ≥3        | Variant   | No change      | 0        |         |          |                     |                         |          |
|           |           | Escalation     | 0.01540  | 0.00979 | 1.57349  | 0.11560             | -0.00378                | 0.03458  |
|           |           | Decline        | -0.04293 | 0.00964 | -4.45250 | <b>0.00001*</b>     | -0.06183                | -0.02403 |

| Sub-group | Attribute      | Levels   | Est.    | SE        | z                   | p | 95% Confidence interval |          |
|-----------|----------------|----------|---------|-----------|---------------------|---|-------------------------|----------|
|           |                |          |         |           |                     |   | lower                   | upper    |
| Vacc      | mRNA_only      | 0        |         |           |                     |   |                         |          |
|           | mRNA+Inactive  | 0.00105  | 0.00789 | 0.13335   | 0.89391             |   | -0.01440                | 0.01651  |
| Omic      | not_adap       | 0.00000  |         |           |                     |   |                         |          |
|           | adap           | 0.10067  | 0.00795 | 12.66216  | <b>&lt;0.00001*</b> |   | 0.08509                 | 0.11625  |
| Incen     | Free           | 0.00000  |         |           |                     |   |                         |          |
|           | Not_free       | -0.19224 | 0.01104 | -17.41449 | <b>&lt;0.00001*</b> |   | -0.21388                | -0.17061 |
|           | Cash           | 0.01169  | 0.01152 | 1.01486   | 0.31017             |   | -0.01089                | 0.03427  |
| Motiv     | Non_cash       | -0.00062 | 0.01147 | -0.05365  | 0.95722             |   | -0.02310                | 0.02187  |
|           | Infect_Ego     | 0.00000  |         |           |                     |   |                         |          |
|           | Econ_Ego       | -0.00395 | 0.01576 | -0.25036  | 0.80231             |   | -0.03484                | 0.02695  |
|           | Serious_Ego    | 0.05132  | 0.01583 | 3.24147   | <b>0.00119*</b>     |   | 0.02029                 | 0.08234  |
|           | Community      | 0.04491  | 0.01584 | 2.83607   | <b>0.00457</b>      |   | 0.01387                 | 0.07595  |
|           | Serious_Friend | 0.04201  | 0.01598 | 2.62921   | <b>0.00856</b>      |   | 0.01069                 | 0.07333  |
|           | Efficacy_Ego   | 0.03812  | 0.01574 | 2.42233   | <b>0.01542</b>      |   | 0.00728                 | 0.06896  |
|           | Econ_Socio     | 0.03322  | 0.01570 | 2.11596   | <b>0.03435</b>      |   | 0.00245                 | 0.06399  |
|           | Health_System  | 0.05355  | 0.01584 | 3.38183   | <b>0.00072*</b>     |   | 0.02252                 | 0.08459  |

Notes: Estimates are Average Marginal Component Effects (AMCEs). The Bonferroni corrected significance level is 0.0031. Significant p-values are marked with (in bold and with a \*) and without Bonferroni correction (in bold).

Supplemental File 12. Effects on the likelihood to get vaccinated by vaccination status (experiment 1)

| Sub-group | Attribute | Levels         | Est.     | SE      | z        | p                   | 95% Confidence interval |          |
|-----------|-----------|----------------|----------|---------|----------|---------------------|-------------------------|----------|
|           |           |                |          |         |          |                     | lower                   | upper    |
| Not       | Variant   | No change      | 0        |         |          |                     |                         |          |
|           |           | Escalation     | -0.07368 | 0.09792 | -0.75247 | 0.45177             | -0.26561                | 0.11824  |
|           |           | Decline        | -0.09389 | 0.10076 | -0.93178 | 0.35145             | -0.29138                | 0.10360  |
|           | Vacc      | mRNA_only      | 0        |         |          |                     |                         |          |
|           |           | mRNA+Inactive  | -0.07497 | 0.08201 | -0.91414 | 0.36064             | -0.23570                | 0.08577  |
|           | Omic      | not_adap       | 0        |         |          |                     |                         |          |
|           |           | adap           | -0.00181 | 0.08171 | -0.02213 | 0.98235             | -0.16196                | 0.15834  |
|           | Incen     | Free           | 0        |         |          |                     |                         |          |
|           |           | Not_free       | -0.02668 | 0.11388 | -0.23424 | 0.81480             | -0.24988                | 0.19653  |
|           |           | Cash           | 0.15437  | 0.11490 | 1.34351  | 0.17911             | -0.07083                | 0.37958  |
|           |           | Non_cash       | 0.08945  | 0.12028 | 0.74368  | 0.45707             | -0.14629                | 0.32518  |
|           | Motiv     | Infect_Ego     | 0        |         |          |                     |                         |          |
|           |           | Econ_Ego       | -0.11694 | 0.15892 | -0.73581 | 0.46185             | -0.42843                | 0.19455  |
|           |           | Serious_Ego    | -0.02317 | 0.16328 | -0.14192 | 0.88714             | -0.34319                | 0.29685  |
|           |           | Community      | 0.34251  | 0.16506 | 2.07513  | <b>0.03797</b>      | 0.01901                 | 0.66601  |
|           |           | Serious_Friend | 0.01827  | 0.16462 | 0.11098  | 0.91163             | -0.30439                | 0.34093  |
|           |           | Efficacy_Ego   | -0.07525 | 0.16166 | -0.46550 | 0.64157             | -0.39210                | 0.24159  |
|           |           | Econ_Socio     | 0.00577  | 0.16198 | 0.03559  | 0.97161             | -0.31170                | 0.32323  |
|           |           | Health_System  | 0.01671  | 0.15842 | 0.10548  | 0.91599             | -0.29379                | 0.32722  |
| 1 or 2    | Variant   | No change      | 0        |         |          |                     |                         |          |
|           |           | Escalation     | 0.10051  | 0.12267 | 0.81934  | 0.41259             | -0.13992                | 0.34094  |
|           |           | Decline        | -0.07083 | 0.12253 | -0.57803 | 0.56324             | -0.31099                | 0.16933  |
|           | Vacc      | mRNA_only      | 0        |         |          |                     |                         |          |
|           |           | mRNA+Inactive  | 0.20805  | 0.10610 | 1.96093  | <b>0.04989</b>      | 0.00010                 | 0.41600  |
|           | Omic      | not_adap       | 0        |         |          |                     |                         |          |
|           |           | adap           | 0.22218  | 0.10721 | 2.07238  | <b>0.03823</b>      | 0.01205                 | 0.43231  |
|           | Incen     | Free           | 0        |         |          |                     |                         |          |
|           |           | Not_free       | -0.43569 | 0.14864 | -2.93113 | <b>0.00338</b>      | -0.72703                | -0.14436 |
|           |           | Cash           | 0.72170  | 0.14923 | 4.83619  | <b>&lt;0.00001*</b> | 0.42922                 | 1.01419  |
|           |           | Non_cash       | 0.67009  | 0.15138 | 4.42652  | <b>0.00001*</b>     | 0.37339                 | 0.96679  |
|           | Motiv     | Infect_Ego     | 0        |         |          |                     |                         |          |
|           |           | Econ_Ego       | -0.15762 | 0.21244 | -0.74196 | 0.45811             | -0.57399                | 0.25875  |
|           |           | Serious_Ego    | 0.02693  | 0.21613 | 0.12459  | 0.90085             | -0.39669                | 0.45054  |
|           |           | Community      | -0.06403 | 0.21579 | -0.29671 | 0.76669             | -0.48697                | 0.35892  |
|           |           | Serious_Friend | -0.23059 | 0.20286 | -1.13670 | 0.25567             | -0.62818                | 0.16700  |
|           |           | Efficacy_Ego   | -0.14123 | 0.21358 | -0.66126 | 0.50844             | -0.55985                | 0.27738  |
|           |           | Econ_Socio     | 0.12467  | 0.21650 | 0.57587  | 0.56470             | -0.29965                | 0.54900  |
|           |           | Health_System  | 0.24894  | 0.22490 | 1.10689  | 0.26834             | -0.19186                | 0.68975  |
| ≥3        | Variant   | No change      | 0        |         |          |                     |                         |          |
|           |           | Escalation     | 0.12168  | 0.05854 | 2.07857  | <b>0.03766</b>      | 0.00694                 | 0.23641  |
|           |           | Decline        | -0.09803 | 0.05631 | -1.74092 | 0.08170             | -0.20840                | 0.01233  |
|           |           |                |          |         |          |                     |                         |          |

| Sub-group | Attribute | Levels         | Est.     | SE      | z         | p                   | 95% Confidence interval |          |
|-----------|-----------|----------------|----------|---------|-----------|---------------------|-------------------------|----------|
|           |           |                |          |         |           |                     | lower                   | upper    |
|           | Vacc      | mRNA_only      | 0        |         |           |                     |                         |          |
|           |           | mRNA+Inactive  | -0.02184 | 0.04743 | -0.46045  | 0.64520             | -0.11481                | 0.07113  |
|           | Omic      | not_adap       | 0        |         |           |                     |                         |          |
|           |           | adap           | 0.27937  | 0.04978 | 5.61235   | <b>&lt;0.00001*</b> | 0.18181                 | 0.37693  |
|           | Incen     | Free           | 0        |         |           |                     |                         |          |
|           |           | Not_free       | -0.79465 | 0.07162 | -11.09570 | <b>&lt;0.00001*</b> | -0.93502                | -0.65428 |
|           |           | Cash           | 0.10122  | 0.06949 | 1.45655   | 0.14524             | -0.03498                | 0.23742  |
|           |           | Non_cash       | 0.19444  | 0.06789 | 2.86395   | <b>0.00418</b>      | 0.06137                 | 0.32750  |
|           | Motiv     | Infect_Ego     | 0        |         |           |                     |                         |          |
|           |           | Econ_Ego       | -0.04325 | 0.09454 | -0.45741  | 0.64738             | -0.22855                | 0.14206  |
|           |           | Serious_Ego    | 0.10482  | 0.09553 | 1.09723   | 0.27254             | -0.08242                | 0.29206  |
|           |           | Community      | 0.05354  | 0.09602 | 0.55752   | 0.57717             | -0.13467                | 0.24174  |
|           |           | Serious_Friend | -0.06231 | 0.09946 | -0.62646  | 0.53101             | -0.25725                | 0.13263  |
|           |           | Efficacy_Ego   | 0.06805  | 0.09559 | 0.71192   | 0.47651             | -0.11930                | 0.25540  |
|           |           | Econ_Socio     | 0.04964  | 0.09523 | 0.52125   | 0.60219             | -0.13701                | 0.23629  |
|           |           | Health_System  | 0.06947  | 0.09715 | 0.71510   | 0.47455             | -0.12093                | 0.25987  |

Notes: Estimates are Average Marginal Component Effects (AMCEs). The Bonferroni corrected significance level is 0.0031. Significant p-values are marked with (in bold and with a \*) and without Bonferroni correction (in bold).

# Supplemental File 13. Effects on trust in the vaccine by country (experiment 2)

| Sub-group | Attribute | Levels          | Est.     | SE      | z         | p                   | 95% Confidence interval |          |
|-----------|-----------|-----------------|----------|---------|-----------|---------------------|-------------------------|----------|
|           |           |                 |          |         |           |                     | lower                   | upper    |
| AT        | Cons      | Cons_scie       | 0        |         |           |                     |                         |          |
|           |           | Cons_phys       | -0.02507 | 0.01233 | -2.03265  | <b>0.04209</b>      | -0.04924                | -0.00090 |
|           |           | False_bal_scie  | -0.07042 | 0.01238 | -5.68660  | <b>&lt;0.00001*</b> | -0.09469                | -0.04615 |
|           |           | False_bal_phys  | -0.07996 | 0.01271 | -6.28968  | <b>&lt;0.00001*</b> | -0.10487                | -0.05504 |
|           | Celeb     | Celeb_not_vacc  | 0        |         |           |                     |                         |          |
|           |           | Celeb_vacc      | 0.05681  | 0.01270 | 4.47460   | <b>0.00001*</b>     | 0.03193                 | 0.08170  |
|           |           | Celeb_waits     | 0.01409  | 0.01226 | 1.14975   | 0.25025             | -0.00993                | 0.03811  |
|           |           | Celeb_ill       | 0.05858  | 0.01221 | 4.79975   | <b>&lt;0.00001*</b> | 0.03466                 | 0.08251  |
|           | LongCo    | 1Percent        | 0        |         |           |                     |                         |          |
|           |           | 5Percent        | 0.02169  | 0.01228 | 1.76637   | 0.07733             | -0.00238                | 0.04576  |
|           |           | 10Percent       | 0.02267  | 0.01228 | 1.84683   | 0.06477             | -0.00139                | 0.04674  |
|           |           | 20Percent       | 0.03266  | 0.01243 | 2.62615   | <b>0.00864</b>      | 0.00828                 | 0.05703  |
|           | GreenPa   | Not_need        | 0        |         |           |                     |                         |          |
|           |           | Needed          | 0.02365  | 0.00900 | 2.62733   | <b>0.00861</b>      | 0.00601                 | 0.04130  |
|           | Mand      | None            | 0        |         |           |                     |                         |          |
|           |           | 50 Years-100 €  | -0.13674 | 0.01101 | -12.41654 | <b>&lt;0.00001*</b> | -0.15832                | -0.11515 |
|           |           | 18 Years-1500 € | -0.18895 | 0.01141 | -16.55585 | <b>&lt;0.00001*</b> | -0.21131                | -0.16658 |
| IT        | Cons      | Cons_scie       | 0        |         |           |                     |                         |          |
|           |           | Cons_phys       | -0.01947 | 0.01288 | -1.51157  | 0.13064             | -0.04472                | 0.00578  |
|           |           | False_bal_scie  | -0.05497 | 0.01264 | -4.34930  | <b>0.00001*</b>     | -0.07974                | -0.03020 |
|           |           | False_bal_phys  | -0.05804 | 0.01276 | -4.54954  | <b>0.00001*</b>     | -0.08304                | -0.03304 |
|           | Celeb     | Celeb_not_vacc  | 0        |         |           |                     |                         |          |
|           |           | Celeb_vacc      | 0.05156  | 0.01268 | 4.06782   | <b>0.00005*</b>     | 0.02672                 | 0.07640  |
|           |           | Celeb_waits     | 0.03305  | 0.01248 | 2.64774   | <b>0.00810</b>      | 0.00859                 | 0.05752  |
|           |           | Celeb_ill       | 0.05350  | 0.01266 | 4.22502   | <b>0.00002*</b>     | 0.02868                 | 0.07832  |
|           | LongCo    | 1Percent        | 0        |         |           |                     |                         |          |
|           |           | 5Percent        | 0.01804  | 0.01255 | 1.43764   | 0.15054             | -0.00656                | 0.04264  |
|           |           | 10Percent       | -0.00962 | 0.01233 | -0.77984  | 0.43549             | -0.03378                | 0.01455  |
|           |           | 20Percent       | 0.01861  | 0.01249 | 1.49010   | 0.13620             | -0.00587                | 0.04308  |
|           | GreenPa   | Not_need        | 0        |         |           |                     |                         |          |
|           |           | Needed          | -0.01002 | 0.00903 | -1.11024  | 0.26690             | -0.02772                | 0.00767  |
|           | Mand      | None            | 0        |         |           |                     |                         |          |
|           |           | 50 Years-100 €  | -0.01775 | 0.01106 | -1.60488  | 0.10852             | -0.03943                | 0.00393  |
|           |           | 18 Years-1500 € | -0.06450 | 0.01130 | -5.70825  | <b>&lt;0.00001*</b> | -0.08665                | -0.04235 |

Notes: Estimates are Average Marginal Component Effects (AMCEs). The Bonferroni corrected significance level is 0.0041. Significant p-values are marked with (in bold and with a \*) and without Bonferroni correction (in bold).

Supplemental File 14. Effects on the likelihood to get vaccinated by country (experiment 2)

| Sub-group | Attribute | Levels          | Est.     | SE      | z        | p              | 95% Confidence interval |          |
|-----------|-----------|-----------------|----------|---------|----------|----------------|-------------------------|----------|
|           |           |                 |          |         |          |                | lower                   | upper    |
| AT        | Cons      | Cons_scie       | 0        |         |          |                |                         |          |
|           |           | Cons_phys       | 0.21534  | 0.09099 | 2.36670  | <b>0.01795</b> | 0.03701                 | 0.39368  |
|           |           | False_bal_scie  | 0.08434  | 0.09252 | 0.91165  | 0.36195        | -0.09699                | 0.26567  |
|           |           | False_bal_phys  | 0.08176  | 0.09302 | 0.87894  | 0.37943        | -0.10056                | 0.26408  |
|           | Celeb     | Celeb_not_vacc  | 0        |         |          |                |                         |          |
|           |           | Celeb_vacc      | 0.11123  | 0.09097 | 1.22268  | 0.22145        | -0.06707                | 0.28952  |
|           |           | Celeb_waits     | 0.03908  | 0.08939 | 0.43723  | 0.66194        | -0.13612                | 0.21429  |
|           |           | Celeb_ill       | 0.13731  | 0.09111 | 1.50716  | 0.13177        | -0.04125                | 0.31588  |
|           | LongCo    | 1Percent        | 0        |         |          |                |                         |          |
|           |           | 5Percent        | 0.13952  | 0.09251 | 1.50812  | 0.13152        | -0.04180                | 0.32084  |
|           |           | 10Percent       | 0.02867  | 0.09061 | 0.31644  | 0.75167        | -0.14891                | 0.20626  |
|           |           | 20Percent       | 0.21252  | 0.09299 | 2.28552  | <b>0.02228</b> | 0.03027                 | 0.39477  |
|           | GreenPa   | Not_need        | 0        |         |          |                |                         |          |
|           |           | Needed          | 0.10520  | 0.06427 | 1.63683  | 0.10167        | -0.02077                | 0.23116  |
|           | Mand      | None            | 0        |         |          |                |                         |          |
|           |           | 50 Years-100 €  | -0.02404 | 0.07911 | -0.30388 | 0.76122        | -0.17908                | 0.13101  |
|           |           | 18 Years-1500 € | -0.00225 | 0.08007 | -0.02810 | 0.97758        | -0.15919                | 0.15469  |
| IT        | Cons      | Cons_scie       | 0        |         |          |                |                         |          |
|           |           | Cons_phys       | 0.02092  | 0.07422 | 0.28191  | 0.77802        | -0.12455                | 0.16639  |
|           |           | False_bal_scie  | -0.10468 | 0.07478 | -1.39992 | 0.16154        | -0.25124                | 0.04188  |
|           |           | False_bal_phys  | -0.17550 | 0.07458 | -2.35317 | <b>0.01861</b> | -0.32167                | -0.02932 |
|           | Celeb     | Celeb_not_vacc  | 0        |         |          |                |                         |          |
|           |           | Celeb_vacc      | 0.13838  | 0.07520 | 1.84000  | 0.06577        | -0.00902                | 0.28577  |
|           |           | Celeb_waits     | 0.03869  | 0.07608 | 0.50855  | 0.61107        | -0.11042                | 0.18780  |
|           |           | Celeb_ill       | 0.14957  | 0.07423 | 2.01499  | 0.04391        | 0.00408                 | 0.29506  |
|           | LongCo    | 1Percent        | 0        |         |          |                |                         |          |
|           |           | 5Percent        | -0.05572 | 0.07403 | -0.75263 | 0.45167        | -0.20082                | 0.08938  |
|           |           | 10Percent       | 0.00061  | 0.07543 | 0.00807  | 0.99356        | -0.14722                | 0.14844  |
|           |           | 20Percent       | -0.00616 | 0.07286 | -0.08449 | 0.93267        | -0.14895                | 0.13664  |
|           | GreenPa   | Not_need        | 0        |         |          |                |                         |          |
|           |           | Needed          | -0.02977 | 0.05325 | -0.55910 | 0.57610        | -0.13415                | 0.07460  |
|           | Mand      | None            | 0        |         |          |                |                         |          |
|           |           | 50 Years-100 €  | -0.01946 | 0.06480 | -0.30037 | 0.76390        | -0.14647                | 0.10754  |
|           |           | 18 Years-1500 € | 0.02937  | 0.06656 | 0.44118  | 0.65908        | -0.10109                | 0.15982  |

Notes: Estimates are Average Marginal Component Effects (AMCEs). The Bonferroni corrected significance level is 0.0041. Significant p-values are marked with (in bold and with a \*) and without Bonferroni correction (in bold).



Supplemental File 15. Effects on trust in the vaccine by vaccination status (experiment 2)

| Sub-group | Attribute | Levels          | Est.     | SE      | z         | p                   | 95% Confidence interval |          |
|-----------|-----------|-----------------|----------|---------|-----------|---------------------|-------------------------|----------|
|           |           |                 |          |         |           |                     | lower                   | upper    |
| Not       | Cons      | Cons_scie       | 0        |         |           |                     |                         |          |
|           |           | Cons_phys       | 0.00414  | 0.01777 | 0.23290   | 0.81584             | -0.03069                | 0.03896  |
|           |           | False_bal_scie  | 0.01052  | 0.01720 | 0.61181   | 0.54066             | -0.02319                | 0.04423  |
|           |           | False_bal_phys  | 0.01980  | 0.01739 | 1.13852   | 0.25490             | -0.01429                | 0.05389  |
|           | Celeb     | Celeb_not_vacc  | 0        |         |           |                     |                         |          |
|           |           | Celeb_vacc      | -0.03725 | 0.01767 | -2.10824  | <b>0.03501</b>      | -0.07188                | -0.00262 |
|           |           | Celeb_waits     | -0.00832 | 0.01735 | -0.47969  | 0.63145             | -0.04232                | 0.02568  |
|           |           | Celeb_ill       | -0.02117 | 0.01721 | -1.23048  | 0.21852             | -0.05490                | 0.01255  |
|           | LongCo    | 1Percent        | 0        |         |           |                     |                         |          |
|           |           | 5Percent        | 0.01820  | 0.01739 | 1.04655   | 0.29531             | -0.01588                | 0.05228  |
|           |           | 10Percent       | -0.01515 | 0.01694 | -0.89401  | 0.37132             | -0.04836                | 0.01806  |
|           |           | 20Percent       | 0.01035  | 0.01762 | 0.58743   | 0.55691             | -0.02419                | 0.04489  |
|           | GreenPa   | Not_need        | 0        |         |           |                     |                         |          |
|           |           | Needed          | -0.05724 | 0.01258 | -4.54910  | <b>0.00001*</b>     | -0.08191                | -0.03258 |
|           | Mand      | None            | 0        |         |           |                     |                         |          |
|           |           | 50 Years-100 €  | -0.09150 | 0.01522 | -6.01030  | <b>&lt;0.00001*</b> | -0.12134                | -0.06166 |
|           |           | 18 Years-1500 € | -0.19141 | 0.01539 | -12.44067 | <b>&lt;0.00001*</b> | -0.22156                | -0.16125 |
| 1 or 2    | Cons      | Cons_scie       | 0        |         |           |                     |                         |          |
|           |           | Cons_phys       | -0.01146 | 0.02412 | -0.47502  | 0.63477             | -0.05874                | 0.03582  |
|           |           | False_bal_scie  | -0.05056 | 0.02398 | -2.10889  | <b>0.03495</b>      | -0.09755                | -0.00357 |
|           |           | False_bal_phys  | -0.03160 | 0.02477 | -1.27578  | 0.20203             | -0.08015                | 0.01695  |
|           | Celeb     | Celeb_not_vacc  | 0        |         |           |                     |                         |          |
|           |           | Celeb_vacc      | 0.02194  | 0.02297 | 0.95540   | 0.33938             | -0.02307                | 0.06695  |
|           |           | Celeb_waits     | 0.00150  | 0.02307 | 0.06487   | 0.94828             | -0.04372                | 0.04671  |
|           |           | Celeb_ill       | 0.01858  | 0.02282 | 0.81448   | 0.41537             | -0.02614                | 0.06330  |
|           | LongCo    | 1Percent        | 0        |         |           |                     |                         |          |
|           |           | 5Percent        | 0.03087  | 0.02440 | 1.26525   | 0.20578             | -0.01695                | 0.07868  |
|           |           | 10Percent       | -0.01203 | 0.02347 | -0.51248  | 0.60831             | -0.05802                | 0.03397  |
|           |           | 20Percent       | 0.00808  | 0.02402 | 0.33659   | 0.73642             | -0.03899                | 0.05515  |
|           | GreenPa   | Not_need        | 0        |         |           |                     |                         |          |
|           |           | Needed          | -0.01378 | 0.01724 | -0.79941  | 0.42405             | -0.04757                | 0.02001  |
|           | Mand      | None            | 0        |         |           |                     |                         |          |
|           |           | 50 Years-100 €  | -0.11380 | 0.02118 | -5.37254  | <b>&lt;0.00001*</b> | -0.15532                | -0.07229 |
|           |           | 18 Years-1500 € | -0.16697 | 0.02207 | -7.56559  | <b>&lt;0.00001*</b> | -0.21023                | -0.12372 |
| ≥3        | Cons      | Cons_scie       | 0        |         |           |                     |                         |          |
|           |           | Cons_phys       | -0.03542 | 0.01140 | -3.10627  | <b>0.00189*</b>     | -0.05777                | -0.01307 |
|           |           | False_bal_scie  | -0.09580 | 0.01141 | -8.39915  | <b>&lt;0.00001*</b> | -0.11816                | -0.07345 |
|           |           | False_bal_phys  | -0.11558 | 0.01151 | -10.04156 | <b>&lt;0.00001*</b> | -0.13814                | -0.09302 |
|           | Celeb     | Celeb_not_vacc  | 0        |         |           |                     |                         |          |
|           |           | Celeb_vacc      | 0.10207  | 0.01160 | 8.80144   | <b>&lt;0.00001*</b> | 0.07934                 | 0.12480  |
|           |           | Celeb_waits     | 0.04370  | 0.01125 | 3.88490   | <b>0.00010*</b>     | 0.02165                 | 0.06575  |

| Sub-group | Attribute | Levels          | Est.     | SE      | z        | p                   | 95% Confidence interval |          |
|-----------|-----------|-----------------|----------|---------|----------|---------------------|-------------------------|----------|
|           |           |                 |          |         |          |                     | lower                   | upper    |
|           |           | Celeb_ill       | 0.09873  | 0.01134 | 8.70474  | <b>&gt;0.00001*</b> | 0.07650                 | 0.12096  |
|           | LongCo    | 1Percent        | 0        |         |          |                     |                         |          |
|           |           | 5Percent        | 0.01777  | 0.01113 | 1.59552  | 0.11060             | -0.00406                | 0.03959  |
|           |           | 10Percent       | 0.02081  | 0.01119 | 1.85948  | 0.06296             | -0.00112                | 0.04275  |
|           |           | 20Percent       | 0.03559  | 0.01122 | 3.17037  | <b>0.00152*</b>     | 0.01359                 | 0.05759  |
|           | GreenPa   | Not_need        | 0        |         |          |                     |                         |          |
|           |           | Needed          | 0.03957  | 0.00814 | 4.85906  | <b>&lt;0.00001*</b> | 0.02361                 | 0.05553  |
|           | Mand      | None            | 0        |         |          |                     |                         |          |
|           |           | 50 Years-100 €  | -0.06248 | 0.01013 | -6.16761 | <b>&lt;0.00001*</b> | -0.08233                | -0.04262 |
|           |           | 18 Years-1500 € | -0.08951 | 0.01042 | -8.59330 | <b>&lt;0.00001*</b> | -0.10992                | -0.06909 |

Notes: Estimates are Average Marginal Component Effects (AMCEs). The Bonferroni corrected significance level is 0.0041. Significant p-values are marked with (in bold and with a \*) and without Bonferroni correction (in bold).

Supplemental File 16. Effects on the likelihood to get vaccinated by vaccination status (experiment 2)

| Sub-group | Attribute | Levels          | Est.     | SE      | z        | p              | 95% Confidence interval |          |
|-----------|-----------|-----------------|----------|---------|----------|----------------|-------------------------|----------|
|           |           |                 |          |         |          |                | lower                   | upper    |
| Not       | Cons      | Cons_scie       | 0        |         |          |                |                         |          |
|           |           | Cons_phys       | 0.15903  | 0.11419 | 1.39274  | 0.16370        | -0.06477                | 0.38284  |
|           |           | False_bal_scie  | 0.14788  | 0.11831 | 1.24992  | 0.21133        | -0.08401                | 0.37977  |
|           |           | False_bal_phys  | -0.01977 | 0.11644 | -0.16982 | 0.86515        | -0.24799                | 0.20844  |
|           | Celeb     | Celeb_not_vacc  | 0        |         |          |                |                         |          |
|           |           | Celeb_vacc      | -0.07428 | 0.11671 | -0.63647 | 0.52447        | -0.30302                | 0.15446  |
|           |           | Celeb_waits     | 0.09549  | 0.11341 | 0.84196  | 0.39981        | -0.12679                | 0.31776  |
|           |           | Celeb_ill       | 0.08271  | 0.11362 | 0.72795  | 0.46664        | -0.13998                | 0.30540  |
|           | LongCo    | 1Percent        | 0        |         |          |                |                         |          |
|           |           | 5Percent        | 0.03886  | 0.11218 | 0.34643  | 0.72902        | -0.18100                | 0.25872  |
|           |           | 10Percent       | 0.02336  | 0.11634 | 0.20078  | 0.84087        | -0.20467                | 0.25139  |
|           |           | 20Percent       | 0.14352  | 0.11433 | 1.25530  | 0.20937        | -0.08057                | 0.36762  |
|           | GreenPa   | Not_need        | 0        |         |          |                |                         |          |
|           |           | Needed          | -0.05709 | 0.08159 | -0.69976 | 0.48407        | -0.21700                | 0.10282  |
|           | Mand      | None            | 0        |         |          |                |                         |          |
|           |           | 50 Years-100 €  | -0.11236 | 0.10136 | -1.10849 | 0.26765        | -0.31102                | 0.08631  |
|           |           | 18 Years-1500 € | -0.15528 | 0.10107 | -1.53637 | 0.12445        | -0.35338                | 0.04281  |
| 1 or 2    | Cons      | Cons_scie       | 0        |         |          |                |                         |          |
|           |           | Cons_phys       | -0.03827 | 0.15135 | -0.25284 | 0.80039        | -0.33491                | 0.25838  |
|           |           | False_bal_scie  | 0.03002  | 0.15661 | 0.19168  | 0.84799        | -0.27694                | 0.33698  |
|           |           | False_bal_phys  | 0.19407  | 0.14876 | 1.30458  | 0.19204        | -0.09750                | 0.48564  |
|           | Celeb     | Celeb_not_vacc  | 0        |         |          |                |                         |          |
|           |           | Celeb_vacc      | 0.07579  | 0.15056 | 0.50336  | 0.61471        | -0.21931                | 0.37089  |
|           |           | Celeb_waits     | -0.01511 | 0.15103 | -0.10003 | 0.92032        | -0.31113                | 0.28091  |
|           |           | Celeb_ill       | 0.23430  | 0.14959 | 1.56622  | 0.11730        | -0.05890                | 0.52750  |
|           | LongCo    | 1Percent        | 0        |         |          |                |                         |          |
|           |           | 5Percent        | 0.05766  | 0.14387 | 0.40079  | 0.68857        | -0.22432                | 0.33964  |
|           |           | 10Percent       | 0.03095  | 0.14479 | 0.21373  | 0.83076        | -0.25283                | 0.31472  |
|           |           | 20Percent       | 0.10209  | 0.14455 | 0.70630  | 0.48000        | -0.18121                | 0.38540  |
|           | GreenPa   | Not_need        | 0        |         |          |                |                         |          |
|           |           | Needed          | -0.04393 | 0.10937 | -0.40168 | 0.68792        | -0.25829                | 0.17043  |
|           | Mand      | None            | 0        |         |          |                |                         |          |
|           |           | 50 Years-100 €  | -0.19357 | 0.12302 | -1.57344 | 0.11562        | -0.43469                | 0.04755  |
|           |           | 18 Years-1500 € | -0.08558 | 0.13945 | -0.61368 | 0.53943        | -0.35888                | 0.18773  |
| ≥3        | Cons      | Cons_scie       | 0        |         |          |                |                         |          |
|           |           | Cons_phys       | 0.08556  | 0.06519 | 1.31250  | 0.18935        | -0.04221                | 0.21332  |
|           |           | False_bal_scie  | -0.13272 | 0.06646 | -1.99705 | <b>0.04582</b> | -0.26297                | -0.00246 |
|           |           | False_bal_phys  | -0.16135 | 0.06719 | -2.40158 | <b>0.01632</b> | -0.29303                | -0.02967 |
|           | Celeb     | Celeb_not_vacc  | 0        |         |          |                |                         |          |
|           |           | Celeb_vacc      | 0.16919  | 0.06648 | 2.54506  | <b>0.01093</b> | 0.03890                 | 0.29948  |
|           |           | Celeb_waits     | 0.00866  | 0.06685 | 0.12957  | 0.89691        | -0.12235                | 0.13968  |

| Sub-group | Attribute | Levels          | Est.     | SE      | z        | p              | 95% Confidence interval |         |
|-----------|-----------|-----------------|----------|---------|----------|----------------|-------------------------|---------|
|           |           |                 |          |         |          |                | lower                   | upper   |
|           |           | Celeb_ill       | 0.13402  | 0.06606 | 2.02869  | <b>0.04249</b> | 0.00454                 | 0.26350 |
|           | LongCo    | 1Percent        | 0        |         |          |                |                         |         |
|           |           | 5Percent        | 0.00656  | 0.06941 | 0.09451  | 0.92470        | -0.12948                | 0.14260 |
|           |           | 10Percent       | -0.02200 | 0.06681 | -0.32923 | 0.74198        | -0.15295                | 0.10896 |
|           |           | 20Percent       | 0.01045  | 0.06858 | 0.15230  | 0.87895        | -0.12398                | 0.14487 |
|           | GreenPa   | Not_need        | 0        |         |          |                |                         |         |
|           |           | Needed          | 0.06838  | 0.04569 | 1.49643  | 0.13454        | -0.02118                | 0.15794 |
|           | Mand      | None            | 0        |         |          |                |                         |         |
|           |           | 50 Years-100 €  | 0.01704  | 0.05943 | 0.28673  | 0.77432        | -0.09944                | 0.13351 |
|           |           | 18 Years-1500 € | 0.07564  | 0.05955 | 1.27020  | 0.20401        | -0.04108                | 0.19237 |

Notes: Estimates are Average Marginal Component Effects (AMCEs). The Bonferroni corrected significance level is 0.0041. Significant p-values are marked with (in bold and with a \*) and without Bonferroni correction (in bold).

## Supplemental File 17. STROBE Statement

Checklist of items that should be included in reports of observational studies.

|                      | Item No | Recommendation                                                                                                                                                                                                                                                                                                                                                                                                                                 | Implementation                                                                                       |
|----------------------|---------|------------------------------------------------------------------------------------------------------------------------------------------------------------------------------------------------------------------------------------------------------------------------------------------------------------------------------------------------------------------------------------------------------------------------------------------------|------------------------------------------------------------------------------------------------------|
| Title and abstract   | 1       | (a) Indicate the study’s design with a commonly used term in the title or the abstract                                                                                                                                                                                                                                                                                                                                                         | The study’s design is included in the title and the abstract.                                        |
|                      |         | (b) Provide in the abstract an informative and balanced summary of what was done and what was found                                                                                                                                                                                                                                                                                                                                            | The abstract includes background, method, results and conclusions.                                   |
| Introduction         |         |                                                                                                                                                                                                                                                                                                                                                                                                                                                |                                                                                                      |
| Background/rationale | 2       | Explain the scientific background and rationale for the investigation being reported                                                                                                                                                                                                                                                                                                                                                           | Is explained in the first two paragraphs of the main text;                                           |
| Objectives           | 3       | State specific objectives, including any prespecified hypotheses                                                                                                                                                                                                                                                                                                                                                                               | In the beginning of the first paragraph in the main text, we explain the objectives.                 |
| Methods              |         |                                                                                                                                                                                                                                                                                                                                                                                                                                                |                                                                                                      |
| Study design         | 4       | Present key elements of study design early in the paper                                                                                                                                                                                                                                                                                                                                                                                        | The study’s design is described in the third paragraph of the main text.                             |
| Setting              | 5       | Describe the setting, locations, and relevant dates, including periods of recruitment, exposure, follow-up, and data collection                                                                                                                                                                                                                                                                                                                | This is explained in the fourth paragraph of the main text as well as in the online methods section. |
| Participants         | 6       | (a) Cohort study—Give the eligibility criteria, and the sources and methods of selection of participants. Describe methods of follow-up<br>Case-control study—Give the eligibility criteria, and the sources and methods of case ascertainment and control selection. Give the rationale for the choice of cases and controls<br>Cross-sectional study—Give the eligibility criteria, and the sources and methods of selection of participants | This is explained in the fourth paragraph of the main text as well as in the online methods section. |
|                      |         | (b) Cohort study—For matched studies, give matching criteria and number of exposed and unexposed<br>Case-control study—For matched studies, give matching criteria and the number of controls per case                                                                                                                                                                                                                                         | NA                                                                                                   |
| Variables            | 7       | Clearly define all outcomes, exposures, predictors, potential confounders, and effect modifiers. Give diagnostic criteria, if applicable                                                                                                                                                                                                                                                                                                       | Partly included in the third paragraph of the main text, the online methods section and              |

|                              | Item No | Recommendation                                                                                                                                                                                                                                                                                            | Implementation                                                                                                                                                  |
|------------------------------|---------|-----------------------------------------------------------------------------------------------------------------------------------------------------------------------------------------------------------------------------------------------------------------------------------------------------------|-----------------------------------------------------------------------------------------------------------------------------------------------------------------|
|                              |         |                                                                                                                                                                                                                                                                                                           | the appendix where we give details about the variables collected and the procedures and exact wording of the attributes and levels of the Conjoint experiments. |
| Data sources/<br>measurement | 8*      | For each variable of interest, give sources of data and details of methods of assessment (measurement). Describe comparability of assessment methods if there is more than one group                                                                                                                      | Described in the online methods section.                                                                                                                        |
| Bias                         | 9       | Describe any efforts to address potential sources of bias                                                                                                                                                                                                                                                 | This is explained in the fourth paragraph of the main text as well as in the online methods section.                                                            |
| Study size                   | 10      | Explain how the study size was arrived at                                                                                                                                                                                                                                                                 | Described in the appendix (Supplemental File 1).                                                                                                                |
| Quantitative variables       | 11      | Explain how quantitative variables were handled in the analyses. If applicable, describe which groupings were chosen and why                                                                                                                                                                              | Described in the third paragraph of the main text as well as in the online methods section.                                                                     |
| Statistical methods          | 12      | (a) Describe all statistical methods, including those used to control for confounding                                                                                                                                                                                                                     | Described in the online methods section and the appendix (Supplemental File 1).                                                                                 |
|                              |         | (b) Describe any methods used to examine subgroups and interactions                                                                                                                                                                                                                                       | Described in the online methods section and the appendix (Supplemental File 1).                                                                                 |
|                              |         | (c) Explain how missing data were addressed                                                                                                                                                                                                                                                               | Described in the appendix (Supplemental File 2).                                                                                                                |
|                              |         | (d) <i>Cohort study</i> —If applicable, explain how loss to follow-up was addressed<br><i>Case-control study</i> —If applicable, explain how matching of cases and controls was addressed<br><i>Cross-sectional study</i> —If applicable, describe analytical methods taking account of sampling strategy | NA                                                                                                                                                              |
|                              |         | (e) Describe any sensitivity analyses                                                                                                                                                                                                                                                                     | NA                                                                                                                                                              |

Continued on next page

## Results

|                  |     |                                                                                                                                                                                                              |                                                                                                                                                                       |
|------------------|-----|--------------------------------------------------------------------------------------------------------------------------------------------------------------------------------------------------------------|-----------------------------------------------------------------------------------------------------------------------------------------------------------------------|
| Participants     | 13* | (a) Report numbers of individuals at each stage of study—eg numbers potentially eligible, examined for eligibility, confirmed eligible, included in the study, completing follow-up, and analysed            | Described in the fourth paragraph of the main text and in the appendix (Supplemental File 3).                                                                         |
|                  |     | (b) Give reasons for non-participation at each stage                                                                                                                                                         | NA                                                                                                                                                                    |
|                  |     | (c) Consider use of a flow diagram                                                                                                                                                                           | NA                                                                                                                                                                    |
| Descriptive data | 14* | (a) Give characteristics of study participants (eg demographic, clinical, social) and information on exposures and potential confounders                                                                     | Described in the fourth paragraph of the main text and in the appendix (Supplemental File 3).                                                                         |
|                  |     | (b) Indicate number of participants with missing data for each variable of interest                                                                                                                          | We describe in the appendix (Supplemental File 2) how we dealt with missing data. Supplemental Files 2 and 3 report frequencies of reposes and missing data.          |
|                  |     | (c) <i>Cohort study</i> —Summarise follow-up time (eg, average and total amount)                                                                                                                             | NA                                                                                                                                                                    |
| Outcome data     | 15* | <i>Cohort study</i> —Report numbers of outcome events or summary measures over time                                                                                                                          | NA                                                                                                                                                                    |
|                  |     | <i>Case-control study</i> —Report numbers in each exposure category, or summary measures of exposure                                                                                                         | NA                                                                                                                                                                    |
|                  |     | <i>Cross-sectional study</i> —Report numbers of outcome events or summary measures                                                                                                                           | Reported in the main text, starting with paragraph 6.                                                                                                                 |
| Main results     | 16  | (a) Give unadjusted estimates and, if applicable, confounder-adjusted estimates and their precision (eg, 95% confidence interval). Make clear which confounders were adjusted for and why they were included | Reported in the Supplemental Files 9 to 16.                                                                                                                           |
|                  |     | (b) Report category boundaries when continuous variables were categorized                                                                                                                                    | NA                                                                                                                                                                    |
|                  |     | (c) If relevant, consider translating estimates of relative risk into absolute risk for a meaningful time period                                                                                             | NA                                                                                                                                                                    |
| Other analyses   | 17  | Report other analyses done—eg analyses of subgroups and interactions, and sensitivity analyses                                                                                                               | Methods used to analyse the data include descriptive statistics, the estimation of Average Conditional Marginal Effects (ACMEs), and graphical depictions (boxplots). |

## Discussion

|                |    |                                                                                                                                                                            |                                                          |
|----------------|----|----------------------------------------------------------------------------------------------------------------------------------------------------------------------------|----------------------------------------------------------|
| Key results    | 18 | Summarise key results with reference to study objectives                                                                                                                   | Described in the last paragraph of the main text.        |
| Limitations    | 19 | Discuss limitations of the study, taking into account sources of potential bias or imprecision. Discuss both direction and magnitude of any potential bias                 | Described in the second last paragraph of the main text. |
| Interpretation | 20 | Give a cautious overall interpretation of results considering objectives, limitations, multiplicity of analyses, results from similar studies, and other relevant evidence | Described in the last two paragraphs of the main text.   |

|                          |    |                                                                                                                                                               |                                                                       |
|--------------------------|----|---------------------------------------------------------------------------------------------------------------------------------------------------------------|-----------------------------------------------------------------------|
| Generalisability         | 21 | Discuss the generalisability (external validity) of the study results                                                                                         | Described in the last two paragraphs of the main text.                |
| <hr/>                    |    |                                                                                                                                                               |                                                                       |
| <b>Other information</b> |    |                                                                                                                                                               |                                                                       |
| Funding                  | 22 | Give the source of funding and the role of the funders for the present study and, if applicable, for the original study on which the present article is based | Included in the beginning of the manuscript (first and second pages). |

\*Give information separately for cases and controls in case-control studies and, if applicable, for exposed and unexposed groups in cohort and cross-sectional studies.

**Note:** An Explanation and Elaboration article discusses each checklist item and gives methodological background and published examples of transparent reporting. The STROBE checklist is best used in conjunction with this article (freely available on the Web sites of PLoS Medicine at <http://www.plosmedicine.org/>, Annals of Internal Medicine at <http://www.annals.org/>, and Epidemiology at <http://www.epidem.com/>). Information on the STROBE Initiative is available at [www.strobe-statement.org](http://www.strobe-statement.org).
